# Supplementary material for: A solvent-selection strategy for the hydrogenation reaction inside a tubular-flow reactor through a statistical approach
Source: Royal Society of Chemistry journal article supplement (doi:10.1039/d4re00309h), 2024-10-01
Supplement: d4re00309h1.pdf [file d4re00309h1.pdf]

## Supporting Information

### A solvent selection strategy on hydrogenation reaction inside tubular-flow reactor through statistic approach

Benny Wahyudianto<sup>a</sup>, Takehiro Yamaki<sup>a</sup>, Nobuo Hara<sup>a</sup>, Yoshihiro Takebayashi<sup>a</sup>, and Sho Kataoka<sup>\*a</sup>

<sup>a</sup>Research Institute for Chemical Process Technology, National Institute of Advanced Industrial Science and Technology, 1-1-1 Higashi, Tsukuba, Ibaraki, 305-8565, Japan.

\*E-mail: s-kataoka@aist.go.jp

#### List of tables

- Table S1.** Detail of nitrobenzene hydrogenation reaction
- Table S2.** List of abbreviations
- Table S3.** Solvent's properties database from Aveva Pro II
- Table S4.** Solvent's properties database from literatures
- Table S5.** Hildebrand's cohesion energy density parameter of solvents
- Table S6.** Kirkwood function on dielectric constant and refractive index
- Table S7.** Solvent parameters on Linear Solvation Energy Relationship (LSER) based on Abraham-Kamlet-Talf model
- Table S8.** Solvent parameters on LSER based on Catalán model
- Table S9.** Solvent parameters on LSER based on Gutmann model
- Table S10.** Solvent parameters on LSER based on Hansen model
- Table S11.** Solvent parameters on LSER based on Koppel-Palm (KP) model
- Table S12.** Solvent parameters on LSER based on Swain model
- Table S13.**  $R^2$ -values of single regression analysis
- Table S14.**  $R^2$ -values of multi regression analysis of  $k_0$  on existing LSER models
- Table S15.**  $P$ -value of each parameter on existing LSER models for entire solvents
- Table S16.** Mathematic equations for predicting nitrobenzene conversion and aniline yield based on existing LSER models
- Table S17.**  $R^2$ -values from a combination of acidity and basicity of solvent
- Table S18.** Statistical analysis of KAMALP-CATASB-SOLWAT multiple regression for nitrobenzene conversion
- Table S19.** Statistical analysis of KAMALP-SWAIBS-DIPOLE multiple regression model for aniline production

## List of figures

- Fig. S1.** The size distribution of PdNPs-stabilized-PVP particles in reaction solution
- Fig. S2.** Single regression analysis of aniline yield vs. KAMALP. Blue: protic solvents/alcohols, red: aprotic solvents
- Fig. S3.** Multiple regression analysis of (a) NBCONV and (b) ANYIEL on AKT model. Blue: protic solvents/alcohols, red: aprotic solvents
- Fig. S4.** Multiple regression analysis of (a) NBCONV and (b) ANYIEL on AKT model with correction on polarizability. Blue: protic solvents/alcohols, red: aprotic solvents
- Fig. S5.** Multiple regression analysis of (a) NBCONV and (b) ANYIEL on Catalán model. Blue: protic solvents/alcohols, red: aprotic solvents
- Fig. S6.** Multiple regression analysis of (a) NBCONV and (b) ANYIEL on Gutmann model. Blue: protic solvents/alcohols, red: aprotic solvents
- Fig. S7.** Multiple regression analysis of (a) NBCONV and (b) ANYIEL on Hansen model. Blue: protic solvents/alcohols, red: aprotic solvents
- Fig. S8.** Multiple regression analysis of (a) NBCONV and (b) ANYIEL on KP model. Blue: protic solvents/alcohols, red: aprotic solvents
- Fig. S9.** Multiple regression analysis of (a) NBCONV and (b) ANYIEL on KP model with correction on Hildebrand's cohesion energy density. Blue: protic solvents/alcohols, red: aprotic solvents
- Fig. S10.** Multiple regression analysis of (a) NBCONV and (b) ANYIEL on Swain model. Blue: protic solvents/alcohols, red: aprotic solvents

## List of References

**Table S1.** Detail of nitrobenzene hydrogenation reaction

| Solvents                        | Substrate               |           |                          |                 | Products                |                 |                           |                 |                           |                 |                           |                 | Material balance (%) | Retention time (s) | $K_0$ (s <sup>-1</sup> ) | Remarks               |
|---------------------------------|-------------------------|-----------|--------------------------|-----------------|-------------------------|-----------------|---------------------------|-----------------|---------------------------|-----------------|---------------------------|-----------------|----------------------|--------------------|--------------------------|-----------------------|
|                                 | NB, $t_R \sim 3.80$ min |           | PHA, $t_R \sim 2.80$ min |                 | AN, $t_R \sim 3.10$ min |                 | HAB, $t_R \sim 4.05$ min. |                 | NSB, $t_R \sim 4.16$ min. |                 | AXB, $t_R \sim 6.30$ min. |                 |                      |                    |                          |                       |
|                                 | Initial (mM)            | Conv. (%) | Yield (%)                | Selectivity (%) | Yield (%)               | Selectivity (%) | Yield (%)                 | Selectivity (%) | Yield (%)                 | Selectivity (%) | Yield (%)                 | Selectivity (%) |                      |                    |                          |                       |
| MeOH                            | 50                      | 55.97     | 3.08                     | 5.50            | 46.09                   | 82.35           | 0.00                      | 0.00            | 0.90                      | 1.61            | 0.00                      | 0.01            | 94.11                | 172                | 0.00477                  | Statistical analysis  |
|                                 | 50                      | 56.59     | 3.87                     | 6.83            | 42.29                   | 74.73           | 0.00                      | 0.00            | 1.97                      | 3.47            | 0.04                      | 0.08            | 91.62                | 227                | 0.00368                  |                       |
|                                 | 50                      | 46.38     | 3.10                     | 6.69            | 36.39                   | 78.46           | 0.00                      | 0.00            | 1.52                      | 3.28            | 0.00                      | 0.00            | 94.64                | 170                | 0.00367                  |                       |
| EtOH                            | 50                      | 38.01     | 3.01                     | 7.91            | 25.74                   | 67.72           | 0.00                      | 0.00            | 8.05                      | 21.17           | 0.24                      | 0.64            | 99.26                | 137                | 0.00349                  | Statistical analysis  |
|                                 | 50                      | 42.54     | 3.84                     | 9.04            | 32.99                   | 77.55           | 0.00                      | 0.00            | 16.00                     | 37.61           | 0.02                      | 0.05            | 110.34               | 131                | 0.00423                  |                       |
|                                 | 50                      | 41.42     | 3.94                     | 9.52            | 32.11                   | 77.53           | 0.00                      | 0.00            | 14.16                     | 34.18           | 0.07                      | 0.17            | 108.93               | 122                | 0.00438                  |                       |
| <i>n</i> -PrOH                  | 50                      | 62.08     | 4.06                     | 6.53            | 54.94                   | 88.49           | 0.00                      | 0.00            | 1.01                      | 1.63            | 0.01                      | 0.02            | 97.94                | 170                | 0.00570                  | Statistical analysis  |
|                                 | 50                      | 64.64     | 3.79                     | 5.86            | 56.38                   | 87.23           | 0.00                      | 0.00            | 0.74                      | 1.15            | 0.01                      | 0.01            | 96.30                | 171                | 0.00608                  |                       |
|                                 | 50                      | 64.69     | 4.11                     | 6.36            | 56.74                   | 87.71           | 0.00                      | 0.00            | 0.78                      | 1.21            | 0.01                      | 0.01            | 96.96                | 170                | 0.00612                  |                       |
| <i>i</i> -PrOH                  | 50                      | 47.59     | 2.42                     | 5.10            | 34.23                   | 71.93           | 0.00                      | 0.00            | 2.58                      | 5.42            | 1.10                      | 2.32            | 93.85                | 189                | 0.00342                  | Statistical analysis  |
|                                 | 50                      | 28.83     | 4.96                     | 17.20           | 18.66                   | 64.72           | 0.00                      | 0.00            | 1.94                      | 6.72            | 0.09                      | 0.32            | 96.91                | 263                | 0.00129                  |                       |
|                                 | 50                      | 31.72     | 5.22                     | 16.47           | 22.18                   | 69.92           | 0.00                      | 0.00            | 1.09                      | 3.44            | 0.06                      | 0.19            | 96.90                | 263                | 0.00145                  |                       |
|                                 | 50                      | 99.50     | 0.33                     | 0.33            | 91.99                   | 92.46           | 0.00                      | 0.00            | 0.37                      | 0.37            | 0.01                      | 0.01            | 93.22                | <i>N/A</i>         | <i>N/A</i>               | 5 min data collection |
|                                 | 50                      | 58.50     | 0.00                     | 0.00            | 55.55                   | 94.96           | 0.00                      | 0.00            | 0.28                      | 0.48            | 0.42                      | 0.72            | 98.17                | <i>N/A</i>         | <i>N/A</i>               | 5 min data collection |
| <i>n</i> -BuOH                  | 50                      | 33.32     | 4.22                     | 12.68           | 25.21                   | 75.69           | 0.00                      | 0.00            | 0.34                      | 1.03            | 0.01                      | 0.03            | 96.48                | 105                | 0.00386                  | Statistical analysis  |
|                                 | 50                      | 30.87     | 5.35                     | 17.33           | 21.84                   | 70.74           | 0.00                      | 0.00            | 0.65                      | 2.10            | 0.11                      | 0.35            | 97.18                | 105                | 0.00352                  |                       |
|                                 | 50                      | 25.36     | 4.82                     | 18.99           | 18.54                   | 73.11           | 0.00                      | 0.00            | 0.63                      | 2.49            | 0.03                      | 0.14            | 98.70                | 105                | 0.00279                  |                       |
| <i>tert</i> -BuOH               | 50                      | 24.99     | 4.86                     | 19.43           | 14.75                   | 59.01           | 0.00                      | 0.00            | 0.67                      | 2.67            | 0.01                      | 0.02            | 95.29                | 147                | 0.00196                  | Statistical analysis  |
|                                 | 50                      | 33.04     | 7.12                     | 21.54           | 23.64                   | 71.55           | 0.00                      | 0.00            | 0.78                      | 2.37            | 0.01                      | 0.03            | 98.52                | 146                | 0.00275                  |                       |
|                                 | 50                      | 44.36     | 7.25                     | 16.35           | 35.00                   | 78.90           | 0.00                      | 0.00            | 1.84                      | 4.16            | 0.01                      | 0.02            | 99.75                | 144                | 0.00407                  |                       |
| Acetone                         | 50                      | 17.07     | 0.00                     | 0.00            | 3.17                    | 18.57           | 0.00                      | 0.00            | 0.30                      | 1.77            | 0.03                      | 0.20            | 86.47                | 199                | 0.00094                  | Statistical analysis  |
| AN                              | 50                      | 23.99     | 2.45                     | 10.21           | 12.64                   | 52.69           | 0.00                      | 0.00            | 1.05                      | 4.38            | 0.03                      | 0.13            | 92.21                | 251                | 0.00109                  | Statistical analysis  |
| AcOEt                           | 50                      | 2.87      | 0.38                     | 13.38           | 3.80                    | 132.12          | 0.00                      | 0.00            | 0.14                      | 4.92            | 0.00                      | 0.00            | 101.45               | 176                | 0.00017                  | Statistical analysis  |
| DMSO                            | 50                      | 8.03      | 0.08                     | 1.01            | 0.04                    | 0.46            | 0.00                      | 0.00            | 0.06                      | 0.77            | 0.00                      | 0.00            | 92.15                | 291                | 0.00029                  | Statistical analysis  |
| Dioxane                         | 50                      | 16.27     | 0.03                     | 0.20            | 0.28                    | 1.69            | 0.00                      | 0.00            | 0.00                      | 0.00            | 0.00                      | 0.00            | 84.04                | 312                | 0.00057                  | Statistical analysis  |
| <i>n</i> -hexane                | 50                      | 12.04     | 0.00                     | 0.00            | 0.49                    | 4.10            | 0.00                      | 0.00            | 0.00                      | 0.00            | 0.00                      | 0.00            | 88.46                | 284                | 0.00045                  | Statistical analysis  |
| THF                             | 50                      | 15.37     | 0.02                     | 0.13            | 0.13                    | 0.87            | 0.00                      | 0.00            | 0.00                      | 0.00            | 0.00                      | 0.00            | 84.78                | 329                | 0.00051                  | Statistical analysis  |
| Toluene                         | 50                      | 9.47      | 0.04                     | 0.46            | 0.89                    | 9.38            | 0.00                      | 0.00            | 0.00                      | 0.00            | 0.19                      | 1.97            | 91.83                | 246                | 0.00040                  | Statistical analysis  |
| CH <sub>2</sub> Cl <sub>2</sub> | 50                      | 12.37     | 0.02                     | 0.16            | 0.28                    | 2.22            | 0.00                      | 0.00            | 0.00                      | 0.00            | 0.01                      | 0.05            | 87.94                | 299                | 0.00044                  | Statistical analysis  |
| CHCl <sub>3</sub>               | 50                      | 20.98     | 0.01                     | 0.07            | 0.29                    | 1.37            | 0.00                      | 0.00            | 0.24                      | 1.12            | 0.00                      | 0.00            | 79.56                | 291                | 0.00081                  | Statistical analysis  |
| CCl <sub>4</sub>                | 50                      | 16.80     | 0.00                     | 0.00            | 0.00                    | 0.00            | 0.00                      | 0.00            | 0.00                      | 0.00            | 1.21                      | 7.20            | 85.62                | 326                | 0.00056                  | Statistical analysis  |
| 2,2,2-trifluoroethanol          | 50                      | 71.89     | 0.30                     | 0.42            | 61.41                   | 85.42           | 0.00                      | 0.00            | 20.81                     | 28.94           | 0.07                      | 0.10            | 110.78               | 300                | 0.00423                  | Validation            |

**NB:** nitrobenzene

**PHA:** *N*-phenylhydroxylamine

**AN:** aniline

**HAB:** hydrazobenzene

**NSB:** nitrosobenzene

**AXB:** azoxybenzene

**Conversion of nitrobenzene (%)** = {Concentration of reacted nitrobenzene (mM) / Concentration of initial nitrobenzene (mM)} × 100 %

**Yield of product (%)** = {Concentration of product (mM) / Concentration of initial nitrobenzene (mM)} × 100 %

**Selectivity of product (%)** = {Concentration of product (mM) / Concentration of reacted nitrobenzene (mM)} × 100 %

**Material balance (%)** = Remaining nitrobenzene (%) + Yield of *N*-phenylhydroxylamine (%) + Yield of aniline (%) + (2 × Yield of Hydrazobenzene) + Yield of nitrosobenzene + (2 × Yield of Azoxybenzene)

$k_0$  (s<sup>-1</sup>) = [- ln {1 - (Concentration of reacted nitrobenzene (mM) / Concentration of initial nitrobenzene (mM))}] / retention time (s)

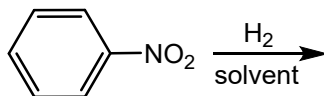

**Table S2.** List of abbreviations

| <b>Abbreviation</b> | <b>Parameter</b>                                                |
|---------------------|-----------------------------------------------------------------|
| <b>ACNTRC</b>       | Acentric factor                                                 |
| <b>AQUEOS</b>       | Aqueous solubility ( $\log S_w$ )                               |
| <b>BOILPT</b>       | Normal boiling point (K)                                        |
| <b>BPP40C</b>       | Boiling point pressure at 313 K (kPa)                           |
| <b>CATASA</b>       | Catalán's acidity parameter                                     |
| <b>CATASB</b>       | Catalán's basicity parameter                                    |
| <b>CATASP</b>       | Catalán's polarizability parameter                              |
| <b>COHESI</b>       | Hildebrand cohesion energy density                              |
| <b>COMBUS</b>       | Heat of combustion ( $\text{J} \cdot \text{mol}^{-1}$ )         |
| <b>CRITCP</b>       | Critical pressure (kPa)                                         |
| <b>CRITCT</b>       | Critical temperature (K)                                        |
| <b>CRITCV</b>       | Critical volume ( $\text{m}^3 \cdot \text{kmol}^{-1}$ )         |
| <b>CRITIC</b>       | Critical compressibility factor                                 |
| <b>DIELEC</b>       | Dielectric constant                                             |
| <b>DIMREN</b>       | Dimroth and Reichardt's hydrogen donor donation (normalization) |
| <b>DIMRET</b>       | Dimroth and Reichardt's hydrogen donor donation                 |
| <b>DIPOLE</b>       | Dipole moment (Deybe)                                           |
| <b>DNSITY</b>       | Density ( $\text{g} \cdot \text{mL}^{-1}$ )                     |
| <b>ENTFOR</b>       | Enthalphy of formation ( $\text{J} \cdot \text{mol}^{-1}$ )     |
| <b>GIBENR</b>       | Gibbs energy of formation ( $\text{J} \cdot \text{mol}^{-1}$ )  |
| <b>GUTACN</b>       | Gutmann's acceptor number                                       |
| <b>GUTDNN</b>       | Gutmann's donor number                                          |
| <b>HEATEV</b>       | Heat evaporation                                                |
| <b>HEATVA</b>       | Lower heating value ( $\text{J} \cdot \text{mol}^{-1}$ )        |
| <b>HETFUS</b>       | Heat of fusion ( $\text{J} \cdot \text{mol}^{-1}$ )             |
| <b>HILDEX</b>       | Hildebrand's solubility parameter (shodex)                      |
| <b>HILTHO</b>       | Hildebrand's solubility parameter                               |
| <b>HISOLU</b>       | Hydrogen solubility ( $\cdot 10^{-4}$ )                         |
| <b>HSNDIS</b>       | Hansen's dispersion parameter                                   |
| <b>HSNHBY</b>       | Hansen's hydrogen bonding parameter                             |

**Table S2.** List of abbreviations (continue)

| <b>Abbreviation</b> | <b>Parameter</b>                                              |
|---------------------|---------------------------------------------------------------|
| <b>HSNMOL</b>       | Hansen's molar volume                                         |
| <b>HSNPOL</b>       | Hansen's polarizability parameter                             |
| <b>HYDDEF</b>       | Hydrogen deficiency number                                    |
| <b>KAMALP</b>       | Taft's hydrogen bond donation parameter                       |
| <b>KAMBET</b>       | Taft's hydrogen bond acceptor parameter                       |
| <b>KAMPHI</b>       | Taft's polarizability parameter                               |
| <b>KIRDIE</b>       | Kirkwood function on dielectric constant                      |
| <b>KIRREF</b>       | Kirkwood function on refractive index                         |
| <b>LOQMOL</b>       | Liquid molar volume ( $\text{m}^3 \cdot \text{kmol}^{-1}$ )   |
| <b>MELTPT</b>       | Normal melting point (K)                                      |
| <b>PRACHR</b>       | Parachor                                                      |
| <b>PRPENE</b>       | PR Peneloux ( $\text{m}^3 \cdot \text{kmol}^{-1}$ )           |
| <b>RADGYR</b>       | Radius of gyration (mm)                                       |
| <b>REFRAC</b>       | Refractive index                                              |
| <b>SOLPAR</b>       | Solubility parameter [ $(\text{cal} \cdot \text{cc})^{0.5}$ ] |
| <b>SOLTAN</b>       | Solvent's solubility in <i>n</i> -octane ( $\log P$ )         |
| <b>SOLWAT</b>       | Solvent's solubility in H <sub>2</sub> O (%w/w)               |
| <b>SRPENE</b>       | SRK Peneloux ( $\text{m}^3 \cdot \text{kmol}^{-1}$ )          |
| <b>SWAIAC</b>       | Swain's acidity parameter                                     |
| <b>SWAIBS</b>       | Swain's- basicity parameter                                   |
| <b>TNSION</b>       | Surface tension ( $\text{N} \cdot \text{m}^{-1}$ )            |
| <b>TRIPRS</b>       | Triple point pressure (kPa)                                   |
| <b>TRITEM</b>       | Triple point temperature (K)                                  |
| <b>UNIFAQ</b>       | UNIFAC Q                                                      |
| <b>UNIFAR</b>       | UNIFAC R                                                      |
| <b>VISCOS</b>       | Viscosity ( <i>cP</i> )                                       |
| <b>WEIGHT</b>       | Molecular weight ( $\text{g} \cdot \text{mol}^{-1}$ )         |

**Table S3.** Solvent's properties database from simulation with Aveva Pro II software

| Solvents                        | Parameters |        |
|---------------------------------|------------|--------|
|                                 | BOILPT     | HEATEV |
| MeOH                            | 337.9      | 35.27  |
| EtOH                            | 351.4      | 38.65  |
| <i>n</i> -PrOH                  | 370.4      | 41.65  |
| <i>i</i> -PrOH                  | 355.4      | 39.38  |
| <i>n</i> -BuOH                  | 390.8      | 43.18  |
| <i>tert</i> -BuOH               | 355.6      | 39.04  |
| Acetone                         | 329.4      | 29.57  |
| Acetonitrile                    | 354.8      | 30.21  |
| AcOEt                           | 350.2      | 32.23  |
| DMSO                            | 464.0      | 43.87  |
| Dioxane                         | 374.5      | 34.37  |
| <i>n</i> -hexane                | 341.9      | 28.79  |
| THF                             | 339.1      | 29.86  |
| Toluene                         | 383.8      | 33.51  |
| CH <sub>2</sub> Cl <sub>2</sub> | 312.9      | 28.38  |
| CHCl <sub>3</sub>               | 334.3      | 29.51  |
| CCl <sub>4</sub>                | 349.8      | 29.77  |



**Table S4.** Solvent's properties database from literatures

| Solvents                        | Parameters          |                     |                       |                     |                      |
|---------------------------------|---------------------|---------------------|-----------------------|---------------------|----------------------|
|                                 | AQUEOS <sup>1</sup> | DIELEC <sup>2</sup> | DIPOLE <sup>3-4</sup> | HISOLU <sup>5</sup> | REFRAC <sup>10</sup> |
| MeOH                            | 1.49                | 32.60               | 2.87                  | 7.90 <sup>6</sup>   | 1.3284               |
| EtOH                            | 1.34                | 24.60               | 1.69                  | 2.06                | 1.3614               |
| <i>n</i> -PrOH                  | 1.22                | 20.10               | 3.09                  | 2.31                | 1.3856               |
| <i>i</i> -PrOH                  | 1.22                | 18.30               | 1.66                  | 2.66                | 1.3772               |
| <i>n</i> -BuOH                  | 0.00                | 17.80               | 1.66                  | 2.69 <sup>7</sup>   | 1.3993               |
| <i>tert</i> -BuOH               | 1.13                | 12.50               | 1.70                  | 3.00                | 1.3877               |
| Acetone                         | 1.24                | 21.01               | 2.69                  | 2.87 <sup>8</sup>   | 1.3586               |
| Acetonitrile                    | 0.26                | 36.64               | 3.44                  | 1.78 <sup>8</sup>   | 1.3441               |
| AcOEt                           | -0.04               | 6.00                | 1.88                  | 3.46                | 1.3724               |
| DMSO                            | 1.11                | 47.00               | 4.10                  | 0.76                | 1.4793               |
| Dioxane                         | 1.05                | 2.21                | 0.45                  | 1.76                | 1.4224               |
| <i>n</i> -hexane                | -3.84               | 1.89                | 0.00                  | 0.01 <sup>8</sup>   | 1.3749               |
| THF                             | 1.15                | 7.52                | 1.75                  | 0.01 <sup>8</sup>   | 1.4072               |
| Toluene                         | -2.21               | 2.38                | 0.31                  | 3.15                | 1.4969               |
| CH <sub>2</sub> Cl <sub>2</sub> | -0.63               | 9.08                | 1.14                  | 1.78 <sup>9</sup>   | 1.4241               |
| CHCl <sub>3</sub>               | -1.17               | 4.81                | 1.15                  | 0.25 <sup>9</sup>   | 1.4458               |
| CCl <sub>4</sub>                | -2.31               | 2.24                | 0.00                  | 0.04 <sup>9</sup>   | 1.4601               |

**Table S4.** Solvent's properties database from literatures (continue)

| Solvents                        | Parameters           |                         |                      |                      |
|---------------------------------|----------------------|-------------------------|----------------------|----------------------|
|                                 | SOLTAN <sup>11</sup> | SOLWAT <sup>12-13</sup> | TNSION <sup>14</sup> | VISCOS <sup>15</sup> |
| MeOH                            | -0.82                | 100                     | 0.023                | 0.59                 |
| EtOH                            | -0.32                | 100                     | 0.022                | 1.10                 |
| <i>n</i> -PrOH                  | 0.34                 | 100                     | 0.023                | 2.30                 |
| <i>i</i> -PrOH                  | 0.26                 | 100                     | 0.022                | 2.40                 |
| <i>n</i> -BuOH                  | 2.34                 | 0.43                    | 0.025                | 2.98                 |
| <i>tert</i> -BuOH               | 0.40                 | 100                     | 0.021                | 3.38                 |
| Acetone                         | -0.24                | 100                     | 0.024                | 0.36                 |
| Acetonitrile                    | -0.34                | 100                     | 0.029                | 0.38                 |
| AcOEt                           | 0.73                 | 8.70                    | 0.024                | 0.45                 |
| DMSO                            | -1.35                | 100                     | 0.043                | 2.24                 |
| Dioxane                         | -0.42                | 100                     | 0.033                | 1.37                 |
| <i>n</i> -hexane                | 3.80                 | 0.00                    | 0.018                | 0.31                 |
| THF                             | 0.46                 | 100                     | 0.027                | 0.55                 |
| Toluene                         | 2.69                 | 0.05                    | 0.028                | 0.59                 |
| CH <sub>2</sub> Cl <sub>2</sub> | 1.25                 | 1.60                    | 0.028                | 0.44                 |
| CHCl <sub>3</sub>               | 1.97                 | 0.82                    | 0.027                | 0.57                 |
| CCl <sub>4</sub>                | 2.64                 | 0.08                    | 0.027                | 0.97                 |

**Table S5.** Hildebrand's cohesion energy density parameter of solvents

| Solvents                        | Parameters           |                            |                      |        |
|---------------------------------|----------------------|----------------------------|----------------------|--------|
|                                 | HEATEV <sup>16</sup> | <i>T</i> (K) <sup>16</sup> | HSNMOL <sup>17</sup> | COHESI |
| MeOH                            | 36.7                 | 313                        | 40.7                 | 0.84   |
| EtOH                            | 42.2                 | 313                        | 58.5                 | 0.68   |
| <i>n</i> -PrOH                  | 46.4                 | 313                        | 75.2                 | 0.58   |
| <i>i</i> -PrOH                  | 44.8                 | 315                        | 76.8                 | 0.55   |
| <i>n</i> -BuOH                  | 53                   | 310                        | 91.5                 | 0.55   |
| <i>tert</i> -BuOH               | 44.9                 | 313                        | 95.8                 | 0.44   |
| Acetone                         | 30.7                 | 313                        | 74.0                 | 0.38   |
| Acetonitrile                    | 34.8                 | 315                        | 52.6                 | 0.61   |
| AcOEt                           | 34.6                 | 313                        | 98.5                 | 0.32   |
| DMSO                            | 52.1                 | 318                        | 71.3                 | 0.69   |
| Dioxane                         | 37                   | 318                        | 85.7                 | 0.40   |
| <i>n</i> -hexane                | 30.7                 | 313                        | 131.6                | 0.21   |
| THF                             | 31.9                 | 311                        | 81.7                 | 0.36   |
| Toluene                         | 37.3                 | 318                        | 106.8                | 0.32   |
| CH <sub>2</sub> Cl <sub>2</sub> | 29.2                 | 308                        | 63.9                 | 0.42   |
| CHCl <sub>3</sub>               | 30.8                 | 321                        | 80.7                 | 0.35   |
| CCl <sub>4</sub>                | 32.3                 | 308                        | 97.1                 | 0.31   |

Hildebrand's cohesion energy density (**COHESI**),  $\text{kJ} \cdot \text{mol}^{-1} = (\text{BPP40C} - RT) / \text{BOILPT}$

*R* : molar gas constant,  $8.314 \text{ J} \cdot \text{mol}^{-1} \cdot \text{K}^{-1}$

**Table S6.** Kirkwood function on dielectric constant and refractive index

| Solvents                        | Parameters |        |
|---------------------------------|------------|--------|
|                                 | KIRDIE     | KIRREF |
| MeOH                            | 0.477      | 0.203  |
| EtOH                            | 0.470      | 0.221  |
| <i>n</i> -PrOH                  | 0.464      | 0.235  |
| <i>i</i> -PrOH                  | 0.460      | 0.230  |
| <i>n</i> -BuOH                  | 0.459      | 0.242  |
| <i>tert</i> -BuOH               | 0.442      | 0.236  |
| Acetone                         | 0.465      | 0.220  |
| Acetonitrile                    | 0.480      | 0.212  |
| AcOEt                           | 0.385      | 0.227  |
| DMSO                            | 0.484      | 0.284  |
| Dioxane                         | 0.223      | 0.254  |
| <i>n</i> -hexane                | 0.186      | 0.229  |
| THF                             | 0.406      | 0.246  |
| Toluene                         | 0.240      | 0.293  |
| CH <sub>2</sub> Cl <sub>2</sub> | 0.422      | 0.255  |
| CHCl <sub>3</sub>               | 0.359      | 0.267  |
| CCl <sub>4</sub>                | 0.226      | 0.274  |

$$\text{KIRDIE}^5 = (\text{DIELEC} - 1) / (2 \times \text{DIELEC} + 1)$$

$$\text{KIRREF}^5 = (\text{REFRAC}^2 - 1) / (\text{REFRAC}^2 + 2)$$

**Table S7.** Solvent parameters on Linear Solvation Energy Relationship (LSER) based on Abraham-About-Kamlet-Talf model<sup>18</sup>

| Solvents                        | Abraham-Abbout-Kamlet-Talf |        |        |                         |        |
|---------------------------------|----------------------------|--------|--------|-------------------------|--------|
|                                 | KAMALP                     | KAMBET | KAMPHI | CORPOL <sup>19-20</sup> | COHESI |
| MeOH                            | 0.93                       | 0.62   | 0.60   | 0.00                    | 0.84   |
| EtOH                            | 0.83                       | 0.77   | 0.54   | 0.00                    | 0.68   |
| <i>n</i> -PrOH                  | 0.84                       | 0.90   | 0.52   | 0.00                    | 0.58   |
| <i>i</i> -PrOH                  | 0.76                       | 0.84   | 0.48   | 0.00                    | 0.55   |
| <i>n</i> -BuOH                  | 0.84                       | 0.84   | 0.47   | 0.00                    | 0.55   |
| <i>tert</i> -BuOH               | 0.42                       | 0.93   | 0.41   | 0.00                    | 0.44   |
| Acetone                         | 0.08                       | 0.48   | 0.40   | 0.00                    | 0.38   |
| Acetonitrile                    | 0.19                       | 0.40   | 0.75   | 0.00                    | 0.61   |
| AcOEt                           | 0.00                       | 0.45   | 0.55   | 0.00                    | 0.32   |
| DMSO                            | 0.00                       | 0.76   | 0.40   | 0.00                    | 0.69   |
| Dioxane                         | 0.00                       | 0.37   | 0.55   | 0.00                    | 0.40   |
| <i>n</i> -hexane                | 0.00                       | 0.00   | -0.04  | 0.00                    | 0.21   |
| THF                             | 0.00                       | 0.55   | 0.58   | 0.00                    | 0.36   |
| Toluene                         | 0.00                       | 0.11   | 0.54   | 1.00                    | 0.32   |
| CH <sub>2</sub> Cl <sub>2</sub> | 0.13                       | 0.10   | 0.82   | 0.50                    | 0.42   |
| CHCl <sub>3</sub>               | 0.20                       | 0.10   | 0.58   | 0.50                    | 0.35   |
| CCl <sub>4</sub>                | 0.00                       | 0.10   | 0.28   | 0.50                    | 0.31   |

Correction on polarizability (**CORPOR**)

**Table S8.** Solvent parameters on LSER based on Catalán model<sup>21</sup>

| Solvents                        | Catalán |        |        |
|---------------------------------|---------|--------|--------|
|                                 | CATASA  | CATASB | CATASP |
| MeOH                            | 0.86    | 0.55   | 0.61   |
| EtOH                            | 0.85    | 0.66   | 0.40   |
| <i>n</i> -PrOH                  | 0.85    | 0.78   | 0.37   |
| <i>i</i> -PrOH                  | 0.85    | 0.83   | 0.28   |
| <i>n</i> -BuOH                  | 0.84    | 0.81   | 0.34   |
| <i>tert</i> -BuOH               | 0.83    | 0.93   | 0.15   |
| Acetone                         | 0.88    | 0.48   | 0.00   |
| Acetonitrile                    | 0.90    | 0.29   | 0.04   |
| AcOEt                           | 0.80    | 0.54   | 0.00   |
| DMSO                            | 1.00    | 0.65   | 0.07   |
| Dioxane                         | 0.70    | 0.44   | 0.00   |
| <i>n</i> -hexane                | 0.52    | 0.06   | 0.00   |
| THF                             | 0.84    | 0.59   | 0.00   |
| Toluene                         | 0.66    | 0.13   | 0.00   |
| CH <sub>2</sub> Cl <sub>2</sub> | 0.88    | 0.18   | 0.04   |
| CHCl <sub>3</sub>               | 0.79    | 0.07   | 0.05   |
| CCl <sub>4</sub>                | 0.63    | 0.04   | 0.00   |

**Table S9.** Solvent parameters on LSER based on Gutmann model<sup>22</sup>

| Solvents                        | Gutmann |        |
|---------------------------------|---------|--------|
|                                 | GUTACN  | GUTDNN |
| MeOH                            | 41.50   | 19.00  |
| EtOH                            | 37.90   | 19.20  |
| <i>n</i> -PrOH                  | 37.30   | 19.80  |
| <i>i</i> -PrOH                  | 33.50   | 21.10  |
| <i>n</i> -BuOH                  | 36.80   | 19.50  |
| <i>tert</i> -BuOH               | 27.10   | 38.00  |
| Acetone                         | 12.50   | 17.00  |
| Acetonitrile                    | 18.90   | 14.10  |
| AcOEt                           | 9.30    | 17.10  |
| DMSO                            | 19.30   | 29.80  |
| Dioxane                         | 10.30   | 14.30  |
| <i>n</i> -hexane                | 0.00    | 0.00   |
| THF                             | 8.00    | 20.00  |
| Toluene                         | 0.00    | 0.10   |
| CH <sub>2</sub> Cl <sub>2</sub> | 20.40   | 1.00   |
| CHCl <sub>3</sub>               | 23.10   | 4.00   |
| CCl <sub>4</sub>                | 8.60    | 0.00   |

**Table S10.** Solvent parameters on LSER based on Hansen model<sup>17</sup>

| Solvents                        | Hansen |        |        |        |
|---------------------------------|--------|--------|--------|--------|
|                                 | HSNDIS | HSNHYB | HSNMOL | HSNPOL |
| MeOH                            | 15.10  | 22.30  | 40.70  | 12.30  |
| EtOH                            | 15.80  | 19.40  | 58.50  | 8.80   |
| <i>n</i> -PrOH                  | 16.00  | 17.40  | 75.20  | 6.80   |
| <i>i</i> -PrOH                  | 15.80  | 16.40  | 76.80  | 6.10   |
| <i>n</i> -BuOH                  | 16.00  | 15.80  | 91.50  | 5.70   |
| <i>tert</i> -BuOH               | 15.20  | 14.70  | 95.80  | 5.10   |
| Acetone                         | 15.50  | 7.00   | 74.00  | 10.40  |
| Acetonitrile                    | 15.30  | 6.10   | 52.60  | 18.00  |
| AcOEt                           | 15.80  | 7.20   | 98.50  | 5.30   |
| DMSO                            | 18.40  | 10.20  | 71.30  | 16.40  |
| Dioxane                         | 19.00  | 7.40   | 85.70  | 1.80   |
| <i>n</i> -hexane                | 14.90  | 0.00   | 131.60 | 0.00   |
| THF                             | 16.80  | 8.00   | 81.70  | 5.70   |
| Toluene                         | 18.00  | 2.00   | 106.80 | 1.40   |
| CH <sub>2</sub> Cl <sub>2</sub> | 18.20  | 6.10   | 63.90  | 6.30   |
| CHCl <sub>3</sub>               | 17.80  | 5.70   | 80.70  | 3.10   |
| CCl <sub>4</sub>                | 17.80  | 0.60   | 97.10  | 0.00   |



**Table S11.** Solvent parameters on LSER based on Koppel–Palm (KP) model

| Solvents                        | Koppel-Palm         |                     |        |                      |                      |
|---------------------------------|---------------------|---------------------|--------|----------------------|----------------------|
|                                 | KIRDIE <sup>5</sup> | KIRREF <sup>5</sup> | COHESI | SWAIBS <sup>23</sup> | DIMRET <sup>24</sup> |
| MeOH                            | 0.48                | 0.20                | 0.84   | 0.50                 | 0.76                 |
| EtOH                            | 0.47                | 0.22                | 0.68   | 0.45                 | 0.65                 |
| <i>n</i> -PrOH                  | 0.46                | 0.23                | 0.58   | 0.44                 | 0.62                 |
| <i>i</i> -PrOH                  | 0.46                | 0.23                | 0.55   | 0.44                 | 0.57                 |
| <i>n</i> -BuOH                  | 0.46                | 0.24                | 0.55   | 0.43                 | 0.60                 |
| <i>tert</i> -BuOH               | 0.44                | 0.24                | 0.44   | 0.50                 | 0.40                 |
| Acetone                         | 0.47                | 0.22                | 0.38   | 0.81                 | 0.57                 |
| Acetonitrile                    | 0.48                | 0.21                | 0.61   | 0.86                 | 0.46                 |
| AcOEt                           | 0.38                | 0.23                | 0.32   | 0.59                 | 0.23                 |
| DMSO                            | 0.48                | 0.28                | 0.69   | 1.08                 | 0.44                 |
| Dioxane                         | 0.22                | 0.25                | 0.40   | 0.67                 | 0.16                 |
| <i>n</i> -hexane                | 0.19                | 0.23                | 0.21   | -0.01                | 0.01                 |
| THF                             | 0.41                | 0.25                | 0.36   | 0.67                 | 0.21                 |
| Toluene                         | 0.24                | 0.29                | 0.32   | 0.54                 | 0.10                 |
| CH <sub>2</sub> Cl <sub>2</sub> | 0.42                | 0.26                | 0.42   | 0.80                 | 0.31                 |
| CHCl <sub>3</sub>               | 0.36                | 0.27                | 0.35   | 0.73                 | 0.26                 |
| CCl <sub>4</sub>                | 0.23                | 0.27                | 0.31   | 0.34                 | 0.05                 |

**Table S12.** Solvent parameters on LSER based on Swain model<sup>[23]</sup>

| Solvents                        | Swain  |        |
|---------------------------------|--------|--------|
|                                 | SWAIAC | SWAIBS |
| MeOH                            | 0.75   | 0.50   |
| EtOH                            | 0.66   | 0.45   |
| <i>n</i> -PrOH                  | 0.63   | 0.44   |
| <i>i</i> -PrOH                  | 0.59   | 0.44   |
| <i>n</i> -BuOH                  | 0.61   | 0.43   |
| <i>tert</i> -BuOH               | 0.45   | 0.50   |
| Acetone                         | 0.25   | 0.81   |
| Acetonitrile                    | 0.37   | 0.86   |
| AcOEt                           | 0.21   | 0.59   |
| DMSO                            | 0.34   | 1.08   |
| Dioxane                         | 0.19   | 0.67   |
| <i>n</i> -hexane                | 0.01   | -0.01  |
| THF                             | 0.17   | 0.67   |
| Toluene                         | 0.13   | 0.54   |
| CH <sub>2</sub> Cl <sub>2</sub> | 0.33   | 0.80   |
| CHCl <sub>3</sub>               | 0.42   | 0.73   |
| CCl <sub>4</sub>                | 0.09   | 0.34   |

**Table S13.**  $R^2$ -values from single regression analysis

| $R^2$ -value            | ACNTRC | AQUEOS | BOILPT | BPP40C | CATASA | CATASB | CATASP | COHESI | COMBUS | CRITCP |
|-------------------------|--------|--------|--------|--------|--------|--------|--------|--------|--------|--------|
| <b>NBCONV</b>           | 0.626  | 0.218  | 0.008  | 0.059  | 0.070  | 0.259  | 0.784  | 0.433  | 0.054  | 0.223  |
| <b>ANYIEL</b>           | 0.727  | 0.233  | 0.000  | 0.102  | 0.094  | 0.353  | 0.819  | 0.474  | 0.016  | 0.166  |
| <b><math>k_0</math></b> | 0.743  | 0.217  | 0.000  | 0.100  | 0.081  | 0.363  | 0.865  | 0.448  | 0.017  | 0.169  |

  

| $R^2$ -value            | CRITCT | CRITCV | CRITIC | DIELEC | DIMREN | DIMRET | DIPOLE | DNSITY | ENTFOR | GIBENR |
|-------------------------|--------|--------|--------|--------|--------|--------|--------|--------|--------|--------|
| <b>NBCONV</b>           | 0.106  | 0.259  | 0.025  | 0.126  | 0.566  | 0.586  | 0.110  | 0.106  | 0.030  | 0.060  |
| <b>ANYIEL</b>           | 0.080  | 0.203  | 0.052  | 0.165  | 0.607  | 0.685  | 0.172  | 0.196  | 0.070  | 0.104  |
| <b><math>k_0</math></b> | 0.078  | 0.180  | 0.018  | 0.132  | 0.626  | 0.674  | 0.120  | 0.161  | 0.078  | 0.108  |

  

| $R^2$ -value            | GUTACN | GUTDNN | HEATEV | HEATVA | HETFUS | HILDEX | HILTHO | HISOLU | HSNDIS | HSNHYB |
|-------------------------|--------|--------|--------|--------|--------|--------|--------|--------|--------|--------|
| <b>NBCONV</b>           | 0.706  | 0.100  | 0.243  | 0.052  | 0.260  | 0.063  | 0.276  | 0.237  | 0.192  | 0.654  |
| <b>ANYIEL</b>           | 0.693  | 0.151  | 0.337  | 0.015  | 0.206  | 0.093  | 0.267  | 0.345  | 0.260  | 0.711  |
| <b><math>k_0</math></b> | 0.757  | 0.142  | 0.379  | 0.015  | 0.204  | 0.144  | 0.315  | 0.286  | 0.223  | 0.741  |

**Table S13.**  $R^2$ -value from single-regression analysis (continue)

| $R^2$ -value  | HSNMOL | HSNPOL | HYDDEF | KAMALP       | KAMBET | KAMPHI | KIRDIE | KIRREF | LOQMOL | MELTPT |
|---------------|--------|--------|--------|--------------|--------|--------|--------|--------|--------|--------|
| <b>NBCONV</b> | 0.237  | 0.044  | 0.232  | <b>0.841</b> | 0.354  | 0.020  | 0.229  | 0.250  | 0.240  | 0.131  |
| <b>ANYIEL</b> | 0.197  | 0.071  | 0.255  | <b>0.852</b> | 0.444  | 0.021  | 0.282  | 0.286  | 0.199  | 0.152  |
| $k_0$         | 0.171  | 0.040  | 0.278  | <b>0.925</b> | 0.457  | 0.011  | 0.265  | 0.237  | 0.173  | 0.157  |

| $R^2$ -value  | PRACHR | PRPENE | RADGYR | REFRAC | SOLPAR | SOLTAN | SOLWAT | SRPENE | SWAIAC | SWAIBS |
|---------------|--------|--------|--------|--------|--------|--------|--------|--------|--------|--------|
| <b>NBCONV</b> | 0.193  | 0.403  | 0.253  | 0.249  | 0.436  | 0.082  | 0.202  | 0.047  | 0.709  | 0.082  |
| <b>ANYIEL</b> | 0.205  | 0.426  | 0.224  | 0.284  | 0.478  | 0.094  | 0.175  | 0.053  | 0.717  | 0.081  |
| $k_0$         | 0.170  | 0.468  | 0.181  | 0.236  | 0.457  | 0.059  | 0.135  | 0.067  | 0.760  | 0.102  |

| $R^2$ -value  | TNSION | TRIPRS | TRITEM | UNIFAQ | UNIFAR | VISCOS | WEIGHT |
|---------------|--------|--------|--------|--------|--------|--------|--------|
| <b>NBCONV</b> | 0.164  | 0.004  | 0.131  | 0.187  | 0.233  | 0.150  | 0.275  |
| <b>ANYIEL</b> | 0.165  | 0.008  | 0.151  | 0.137  | 0.186  | 0.179  | 0.350  |
| $k_0$         | 0.172  | 0.005  | 0.157  | 0.112  | 0.156  | 0.226  | 0.294  |

Note:

Value with a bold-style indicates the best  $R^2$ -value on each category (**NBCONV**, **ANYIEL**, or  $k_0$ )

**Table S14.**  $R^2$ -values of multi regression analysis of  $k_0$  on existing LSER models

| No. | LSER model                        | $R^2$ -value    |                 |                  |
|-----|-----------------------------------|-----------------|-----------------|------------------|
|     |                                   | $k_0$           |                 |                  |
|     |                                   | Entire solvents | Protic solvents | Aprotic solvents |
| 1   | AKT                               | 0.929           | 0.866           | 0.582            |
| 2   | AKT w/ polarity cor.              | 0.929           | 0.880           | 0.583            |
| 3   | AKT w/ polarity and cohesion cor. | 0.929           | N/A             | 0.590            |
| 4   | Catalán                           | 0.885           | 0.749           | 0.307            |
| 5   | Gutmann                           | 0.762           | 0.627           | 0.168            |
| 6   | Hansen                            | 0.798           | 0.647           | 0.615            |
| 7   | KP                                | 0.889           | 0.726           | 0.441            |
| 8   | KP w/ cohesion cor.               | 0.894           | N/A             | 0.441            |
| 9   | Swain                             | 0.883           | 0.598           | 0.197            |

**Table S15.** *P*-value of each parameter on existing LSER models for entire solvents

| No. | LSER model                        | Entire solvents |                     |        |                     |                       |                     |
|-----|-----------------------------------|-----------------|---------------------|--------|---------------------|-----------------------|---------------------|
|     |                                   | NBCONV          | <i>P</i> -value (%) | ANYIEL | <i>P</i> -value (%) | <i>k</i> <sub>0</sub> | <i>P</i> -value (%) |
| 1   | AKT                               | KAMALP          | <1                  | KAMALP | <1                  | KAMALP                | <1                  |
| 2   | AKT w/ polarity cor.              | KAMALP          | <1                  | KAMALP | <1                  | KAMALP                | <1                  |
| 3   | AKT w/ polarity and cohesion cor. | KAMALP          | <1                  | KAMALP | <1                  | KAMALP                | <1                  |
| 4   | Catalán                           | CATASP          | <1                  | CATASP | <1                  | CATASP                | <1                  |
| 5   | Gutmann                           | GUTACN          | <1                  | GUTACN | <1                  | GUTACN                | <1                  |
| 6   | Hansen                            | HSNHYB          | 1.33                | HSNHYB | <1                  | HSNHYB                | <1                  |
| 7   | KP                                | DIMRET          | <1                  | DIMRET | <1                  | DIMRET                | <1                  |
|     |                                   |                 |                     | SWAIBS | 2.28                | SWAIBS                | <1                  |
| 8   | KP w/ cohesion cor.               | N/A             | N/A                 | SWAIBS | 1.65                | DIMRET                | 1.16                |
|     |                                   |                 |                     | SWAIBS | <1                  | SWAIBS                | <1                  |
| 9   | Swain                             | SWAIAC          | <1                  | SWAIAC | <1                  | SWAIAC                | <1                  |
|     |                                   | SWAIBS          | 1.64                | SWAIBS | 1.47                | SWAIBS                | <1                  |

**Table S16.** Mathematic equations generating from experimental outputs and some parameters from the existing LSER models

| Model                                          | y-axis | Mathematic equations                                                                                                                                          |
|------------------------------------------------|--------|---------------------------------------------------------------------------------------------------------------------------------------------------------------|
| AKT                                            |        | $y = A_0 + A_1 \cdot (\text{KAMALP}) + A_2 \cdot (\text{KAMBET}) + A_3 \cdot (\text{KAMPHI})$                                                                 |
|                                                | NBCONV | $y = 12.77 + 44.19 \cdot (\text{KAMALP}) - 2.90 \cdot (\text{KAMBET}) - 0.77 \cdot (\text{KAMPHI})$                                                           |
|                                                | ANYIEL | $y = -1.47 + 41.95 \cdot (\text{KAMALP}) + 3.99 \cdot (\text{KAMBET}) - 0.50 \cdot (\text{KAMPHI})$                                                           |
|                                                | $k_0$  | $y = 0.47 + 4.53 \cdot (\text{KAMALP}) + 0.21 \cdot (\text{KAMBET}) - 0.49 \cdot (\text{KAMPHI})$                                                             |
| AKT w/ polarizability correction               |        | $y = A_0 + A_1 \cdot (\text{KAMALP}) + A_2 \cdot (\text{KAMBET}) + A_3 \cdot (\text{KAMPHI}) + A_4 \cdot (\text{CORPOL})$                                     |
|                                                | NBCONV | $y = 13.88 + 44.60 \cdot (\text{KAMALP}) - 5.59 \cdot (\text{KAMBET}) + 0.54 \cdot (\text{KAMPHI}) - 3.89 \cdot (\text{CORPOL})$                              |
|                                                | ANYIEL | $y = -0.53 + 42.30 \cdot (\text{KAMALP}) + 1.72 \cdot (\text{KAMBET}) + 0.61 \cdot (\text{KAMPHI}) - 3.29 \cdot (\text{CORPOL})$                              |
|                                                | $k_0$  | $y = 0.47 + 4.54 \cdot (\text{KAMALP}) + 0.21 \cdot (\text{KAMBET}) - 0.49 \cdot (\text{KAMPHI}) - 0.00 \cdot (\text{CORPOL})$                                |
| AKT w/ polarizability and cohesion corrections |        | $y = A_0 + A_1 \cdot (\text{KAMALP}) + A_2 \cdot (\text{KAMBET}) + A_3 \cdot (\text{KAMPHI}) + A_4 \cdot (\text{POLCOR}) + A_5 \cdot (\text{COHESI})$         |
|                                                | NBCONV | $y = 14.00 + 54.24 \cdot (\text{KAMALP}) - 2.55 \cdot (\text{KAMBET}) - 4.30 \cdot (\text{KAMPHI}) - 2.34 \cdot (\text{CORPOL}) + 1.48 \cdot (\text{COHESI})$ |
|                                                | ANYIEL | $y = -1.27 + 14.37 \cdot (\text{KAMALP}) - 3.91 \cdot (\text{KAMBET}) + 3.04 \cdot (\text{KAMPHI}) - 4.74 \cdot (\text{CORPOL}) + 8.27 \cdot (\text{COHESI})$ |
|                                                | $k_0$  | $y = 0.58 + 3.31 \cdot (\text{KAMALP}) + 0.31 \cdot (\text{KAMBET}) - 0.36 \cdot (\text{KAMPHI}) - 0.01 \cdot (\text{POLCOR}) - 0.28 \cdot (\text{COHESI})$   |

**Table S16.** Mathematic equations generating from experimental outputs and some parameters from the existing LSER models (continue)

| <b>Model</b>   | <b>y-axis</b> | <b>Mathematic equations</b>                                                                                                      |
|----------------|---------------|----------------------------------------------------------------------------------------------------------------------------------|
|                |               | $y = C_0 + C_1 \cdot (\text{CATASA}) + C_2 \cdot (\text{CATASB}) + C_3 \cdot (\text{CATASP})$                                    |
| <b>Catalán</b> | <b>NBCONV</b> | $y = 19.41 - 9.48 \cdot (\text{CATASA}) + 3.79 \cdot (\text{CATASB}) + 79.38 \cdot (\text{CATASP})$                              |
|                | <b>ANYIEL</b> | $y = 6.24 - 11.25 \cdot (\text{CATASA}) + 10.75 \cdot (\text{CATASB}) + 78.48 \cdot (\text{CATASP})$                             |
|                | $k_0$         | $y = 1.47 - 1.77 \cdot (\text{CATASA}) + 1.16 \cdot (\text{CATASB}) + 8.16 \cdot (\text{CATASP})$                                |
|                |               | $y = G_0 + G_1 \cdot (\text{GUTACN}) + G_2 \cdot (\text{GUTDNN})$                                                                |
| <b>Gutmann</b> | <b>NBCONV</b> | $y = 4.50 + 1.16 \cdot (\text{GUTACN}) - 0.23 \cdot (\text{GUTDNN})$                                                             |
|                | <b>ANYIEL</b> | $y = -8.58 + 1.12 \cdot (\text{GUTACN}) - 0.07 \cdot (\text{GUTDNN})$                                                            |
|                | $k_0$         | $y = -0.49 + 0.12 \cdot (\text{GUTACN}) - 0.01 \cdot (\text{GUTDNN})$                                                            |
|                |               | $y = H_0 + H_1 \cdot (\text{HSNDIS}) + H_2 \cdot (\text{HSNHYB}) + H_3 \cdot (\text{HSNMOL}) + H_4 \cdot (\text{HSNPOL})$        |
| <b>Hansen</b>  | <b>NBCONV</b> | $y = 106.95 - 3.56 \cdot (\text{HSNDIS}) + 1.57 \cdot (\text{HSNHYB}) - 0.35 \cdot (\text{HSNMOL}) - 1.48 \cdot (\text{HSNPOL})$ |
|                | <b>ANYIEL</b> | $y = 68.96 - 3.50 \cdot (\text{HSNDIS}) + 1.93 \cdot (\text{HSNHYB}) - 0.14 \cdot (\text{HSNMOL}) - 0.77 \cdot (\text{HSNPOL})$  |
|                | $k_0$         | $y = 6.01 - 0.28 \cdot (\text{HSNDIS}) + 0.21 \cdot (\text{HSNHYB}) - 0.01 \cdot (\text{HSNMOL}) - 0.10 \cdot (\text{HSNPOL})$   |



**Table S16.** Mathematic equations generating from experimental outputs and some parameters from the existing LSER models (continue)

| Model                     | y-axis | Mathematic equations                                                                                                                                              |
|---------------------------|--------|-------------------------------------------------------------------------------------------------------------------------------------------------------------------|
| KP                        |        | $y = K_0 + K_1 \cdot (\text{KIRDIE}) + K_2 \cdot (\text{KIRREF}) + K_3 \cdot (\text{SWAIBS}) + K_4 \cdot (\text{DIMRET})$                                         |
|                           | NBCONV | $y = 6.17 - 41.91 \cdot (\text{KIRDIE}) + 81.58 \cdot (\text{KIRREF}) - 28.76 \cdot (\text{SWAIBS}) + 83.93 \cdot (\text{DIMRET})$                                |
|                           | ANYIEL | $y = -11.19 - 8.76 \cdot (\text{KIRDIE}) + 78.85 \cdot (\text{KIRREF}) - 34.53 \cdot (\text{SWAIBS}) + 75.92 \cdot (\text{DIMRET})$                               |
|                           | $k_0$  | $y = -2.45 - 1.79 \cdot (\text{KIRDIE}) + 15.98 \cdot (\text{KIRREF}) - 3.90 \cdot (\text{SWAIBS}) + 8.66 \cdot (\text{DIMRET})$                                  |
| KP w/ cohesion correction |        | $y = K_0 + K_1 \cdot (\text{KIRDIE}) + K_2 \cdot (\text{KIRREF}) + K_3 \cdot (\text{COHESI}) + K_4 \cdot (\text{SWAIBS}) + K_5 \cdot (\text{DIMRET})$             |
|                           | NBCONV | $y = 4.27 - 33.33 \cdot (\text{KIRDIE}) + 66.09 \cdot (\text{KIRREF}) + 21.64 \cdot (\text{COHESI}) - 31.16 \cdot (\text{SWAIBS}) + 66.62 \cdot (\text{DIMRET})$  |
|                           | ANYIEL | $y = -13.83 + 3.13 \cdot (\text{KIRDIE}) + 57.35 \cdot (\text{KIRREF}) + 30.05 \cdot (\text{COHESI}) - 37.86 \cdot (\text{SWAIBS}) + 51.89 \cdot (\text{DIMRET})$ |
|                           | $k_0$  | $y = -2.58 - 1.21 \cdot (\text{KIRDIE}) + 14.92 \cdot (\text{KIRREF}) + 1.47 \cdot (\text{COHESI}) - 4.06 \cdot (\text{SWAIBS}) + 7.49 \cdot (\text{DIMRET})$     |
| Swain                     |        | $y = S_1 + S_2 \cdot (\text{SWAIAC}) + S_3 \cdot (\text{SWAIBS})$                                                                                                 |
|                           | NBCONV | $y = 13.28 + 66.11 \cdot (\text{SWAIAC}) - 22.21 \cdot (\text{SWAIBS})$                                                                                           |
|                           | ANYIEL | $y = 1.31 + 68.87 \cdot (\text{SWAIAC}) - 23.01 \cdot (\text{SWAIBS})$                                                                                            |
|                           | $k_0$  | $y = 0.61 + 7.12 \cdot (\text{SWAIAC}) - 2.55 \cdot (\text{SWAIBS})$                                                                                              |

**Table S17.**  $R^2$ -values from a combination of acidity and basicity of solvent

| Parameter |        | $R^2$ -score |        | Parameter     |               | $R^2$ -score |              |
|-----------|--------|--------------|--------|---------------|---------------|--------------|--------------|
| 1         | 2      | NBCONV       | ANYIEL | 1             | 2             | NBCONV       | ANYIEL       |
| CATASA    | CATASB | 0.261        | 0.356  | DIMREN        | CATASB        | 0.566        | 0.615        |
| CATASA    | GUTACN | 0.781        | 0.739  | DIMREN        | GUTACN        | 0.707        | 0.702        |
| CATASA    | KAMBET | 0.375        | 0.466  | DIMREN        | KAMBET        | 0.568        | 0.621        |
| CATASA    | SWAIBS | 0.574        | 0.666  | DIMREN        | SWAIBS        | 0.759        | 0.805        |
| GUTDNN    | CATASB | 0.386        | 0.488  | <b>KAMALP</b> | <b>CATASB</b> | <b>0.846</b> | <b>0.853</b> |
| GUTDNN    | GUTACN | 0.722        | 0.694  | <b>KAMALP</b> | <b>GUTACN</b> | <b>0.842</b> | <b>0.857</b> |
| GUTDNN    | KAMBET | 0.634        | 0.704  | <b>KAMALP</b> | <b>KAMBET</b> | <b>0.842</b> | <b>0.855</b> |
| GUTDNN    | SWAIBS | 0.248        | 0.315  | <b>KAMALP</b> | <b>SWAIBS</b> | <b>0.841</b> | <b>0.852</b> |
| HSNHYB    | CATASB | 0.714        | 0.732  | SWAIAC        | CATASB        | 0.710        | 0.722        |
| HSNHYB    | GUTACN | 0.715        | 0.732  | SWAIAC        | GUTACN        | 0.713        | 0.717        |
| HSNHYB    | KAMBET | 0.683        | 0.719  | SWAIAC        | KAMBET        | 0.709        | 0.725        |
| HSNHYB    | SWAIBS | 0.727        | 0.783  | <b>SWAIAC</b> | <b>SWAIBS</b> | <b>0.810</b> | <b>0.817</b> |

NB: bold letter indicates top five  $R^2$ -score

**Table S18.** Statistical analysis of KAMALP–CATASB–SOLWAT multiple regression for nitrobenzene conversion

**Summary Output**

| <b>Regression Statistics</b> |      |
|------------------------------|------|
| Multiple R                   | 0.95 |
| R Square                     | 0.91 |
| Adjusted R Square            | 0.89 |
| Standard Error               | 5.76 |
| Observations                 | 17   |

**ANOVA**

|                   | <b>df</b> | <b>SS</b> | <b>MS</b> | <b>F</b> | <b>Significance F</b> |
|-------------------|-----------|-----------|-----------|----------|-----------------------|
| <b>Regression</b> | 3         | 4310.9    | 1437.0    | 43.3     | 5.0E-07               |
| <b>Residual</b>   | 13        | 431.0     | 33.2      |          |                       |
| <b>Total</b>      | 16        | 4741.9    |           |          |                       |

|           | <b>Coefficients</b> | <b>Standard Error</b> | <b>t Stat</b> | <b>P-value</b> | <b>Lower 95%</b> | <b>Upper 95%</b> |
|-----------|---------------------|-----------------------|---------------|----------------|------------------|------------------|
| Intercept | 12.22               | 2.73                  | 4.48          | 0.00           | 6.32             | 18.11            |
| KAMALP    | 46.54               | 4.94                  | 9.43          | 0.00           | 35.87            | 57.20            |
| CATASB    | -18.22              | 7.56                  | -2.41         | 0.03           | -34.56           | -1.88            |
| SOLWAT    | 0.11                | 0.04                  | 3.00          | 0.01           | 0.03             | 0.19             |

**Table S19.** Statistical analysis of KAMALP–SWAIBS–DIPOLE multiple regression model for aniline production

**Summary Output**

| <b>Regression Statistics</b> |      |
|------------------------------|------|
| Multiple R                   | 0.95 |
| R Square                     | 0.90 |
| Adjusted R Square            | 0.88 |
| Standard Error               | 6.15 |
| Observations                 | 17   |

**ANOVA**

|                   | <b>df</b> | <b>SS</b> | <b>MS</b> | <b>F</b> | <b>Significance F</b> |
|-------------------|-----------|-----------|-----------|----------|-----------------------|
| <b>Regression</b> | 3         | 4599.8    | 1533.3    | 40.5     | 7.3E-07               |
| <b>Residual</b>   | 13        | 491.8     | 37.8      |          |                       |
| <b>Total</b>      | 16        | 5091.6    |           |          |                       |

|           | <b>Coefficients</b> | <b>Standard Error</b> | <b>t Stat</b> | <b>P-value</b> | <b>Lower 95%</b> | <b>Upper 95%</b> |
|-----------|---------------------|-----------------------|---------------|----------------|------------------|------------------|
| Intercept | 5.07                | 4.96                  | 1.02          | 0.33           | -5.65            | 15.79            |
| KAMALP    | 34.92               | 5.55                  | 6.29          | 0.00           | 22.93            | 46.91            |
| SWAIBS    | -20.72              | 9.92                  | -2.09         | 0.06           | -42.15           | 0.71             |
| DIPOLE    | 5.35                | 2.05                  | 2.62          | 0.02           | 0.93             | 9.77             |

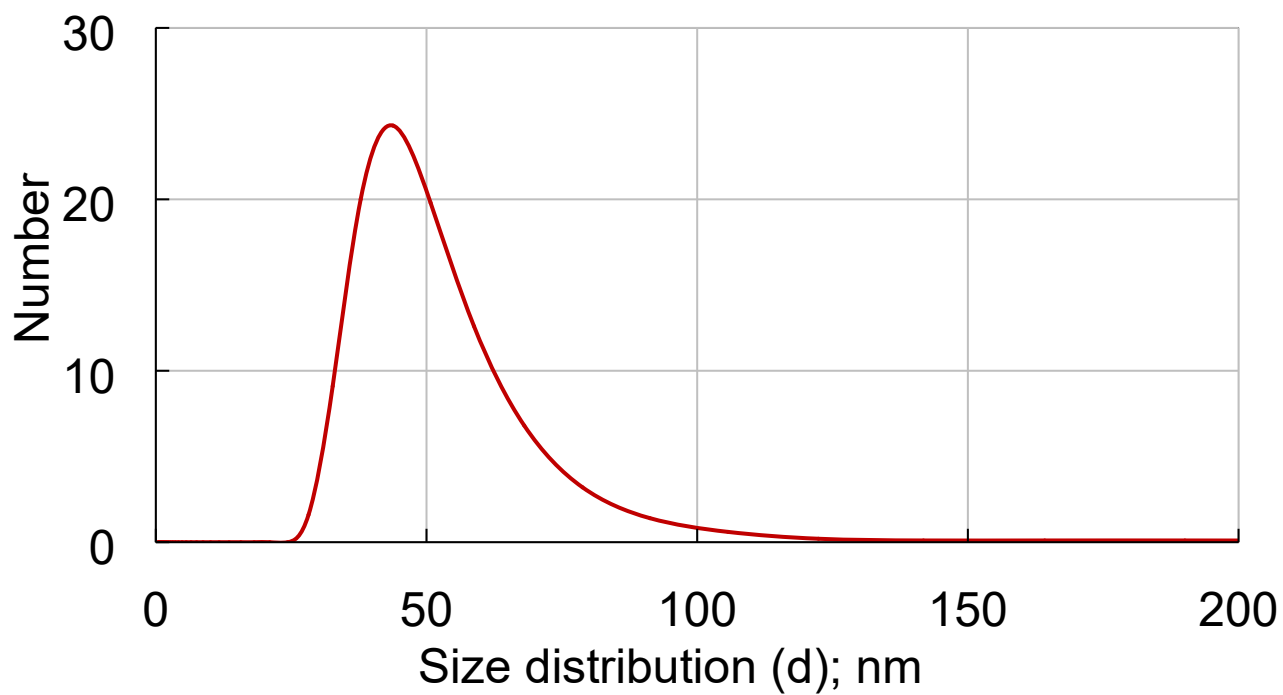

**Fig. S1.** The size distribution of PdNPs-stabilized-PVP particles in reaction solution

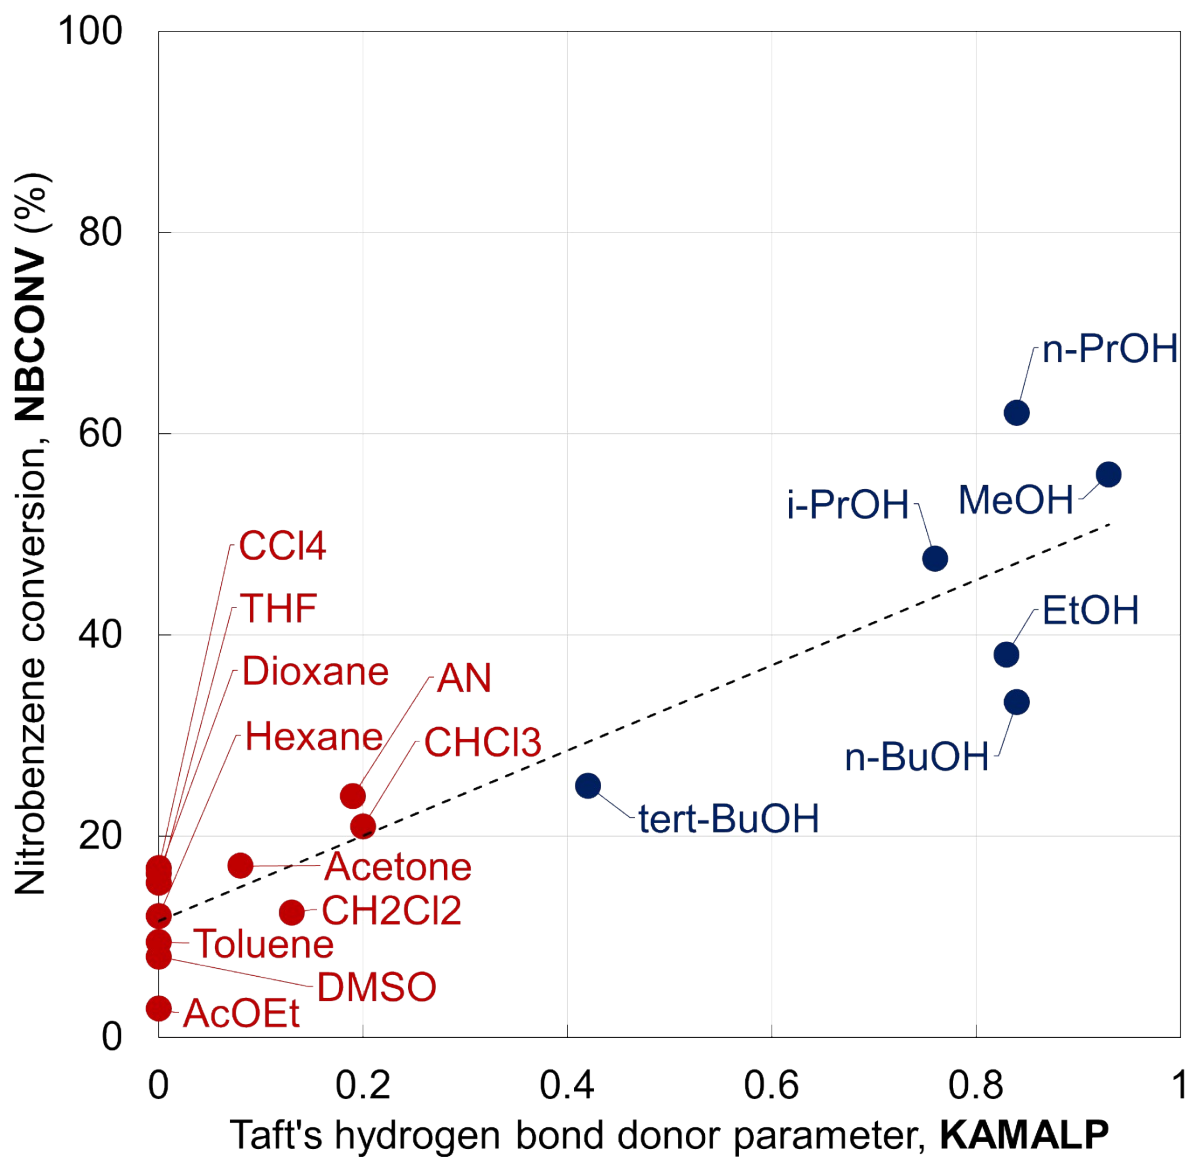

**Fig. S2.** Single regression analysis of aniline yield vs. **KAMALP**. Blue: protic solvents/alcohols, red: aprotic solvents

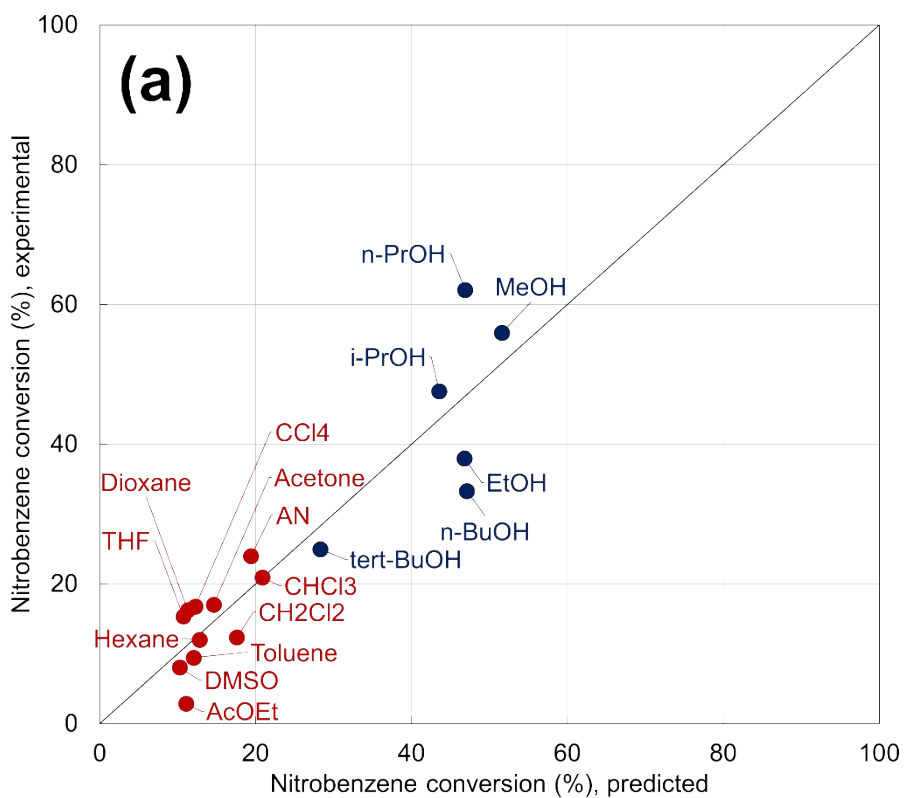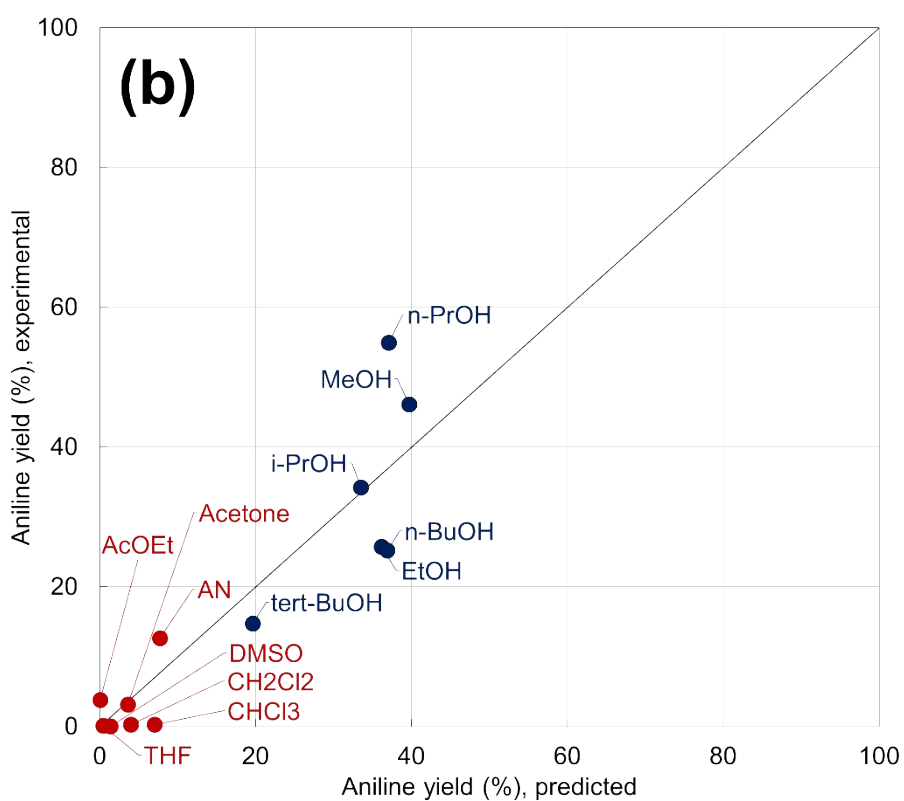

**Fig. S3.** Multiple regression analysis of (a) **NBCONV** and (b) **ANYIEL** on AKT model. Blue: protic solvents/alcohols, red: aprotic solvents

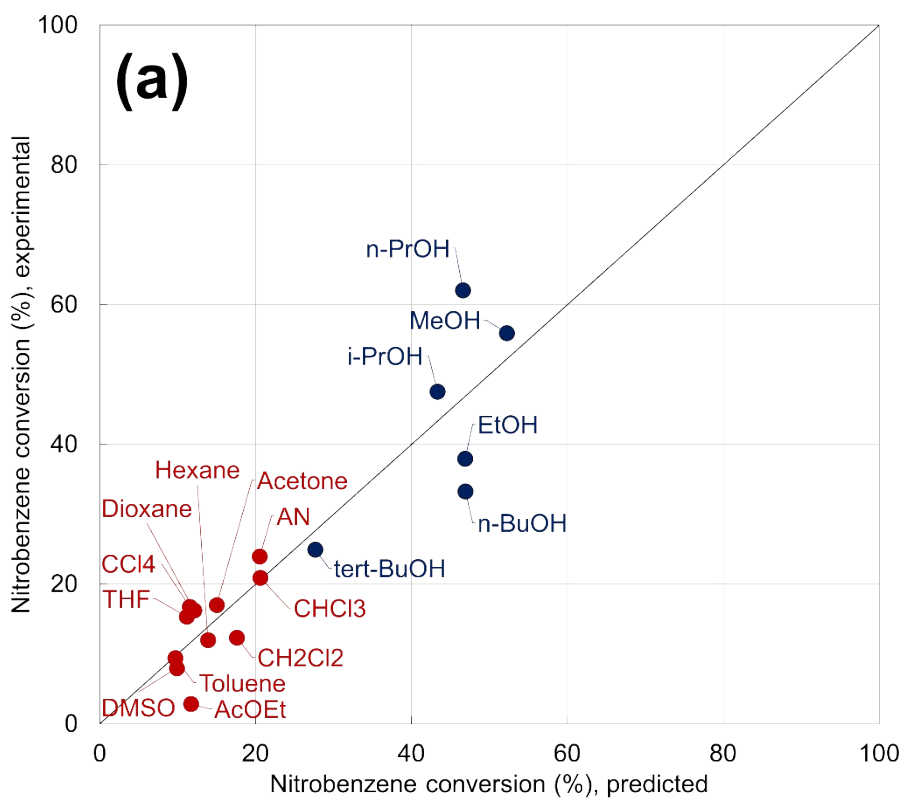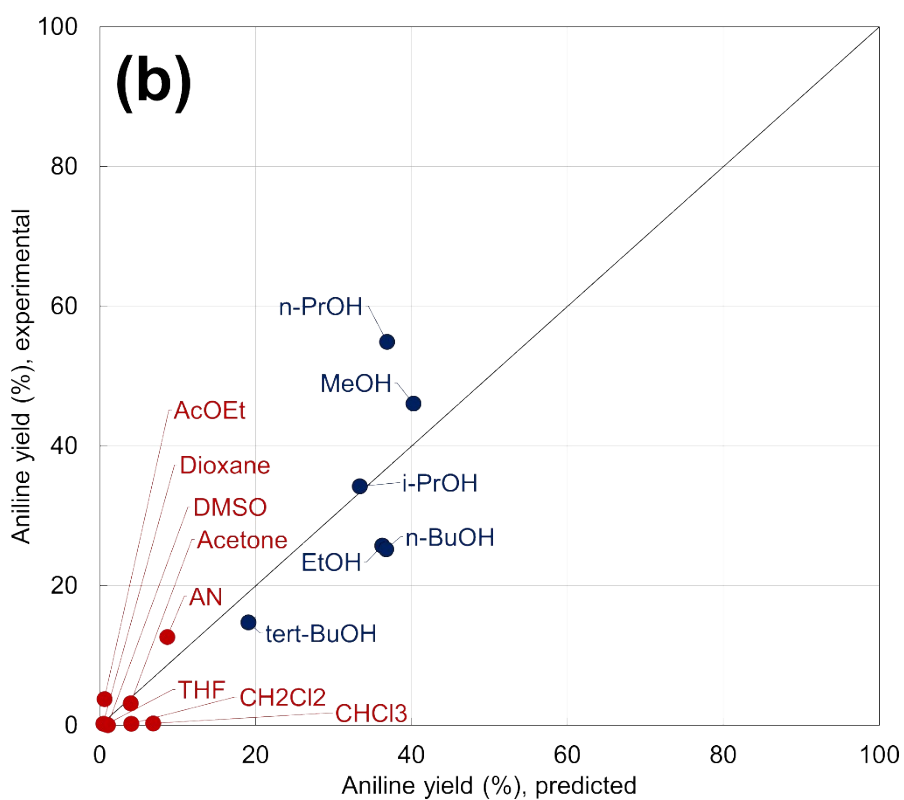

**Fig. S4.** Multiple regression analysis of (a) **NBCONV** and (b) **ANYIEL** on AKT model with correction on polarizability. Blue: protic solvents/alcohols, red: aprotic solvents



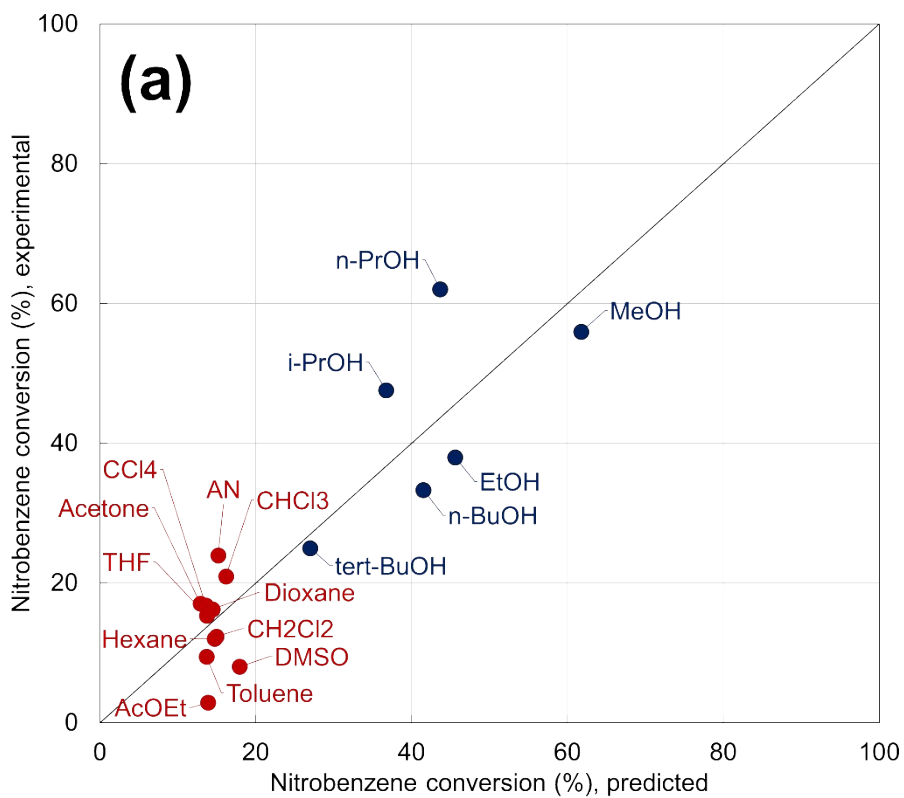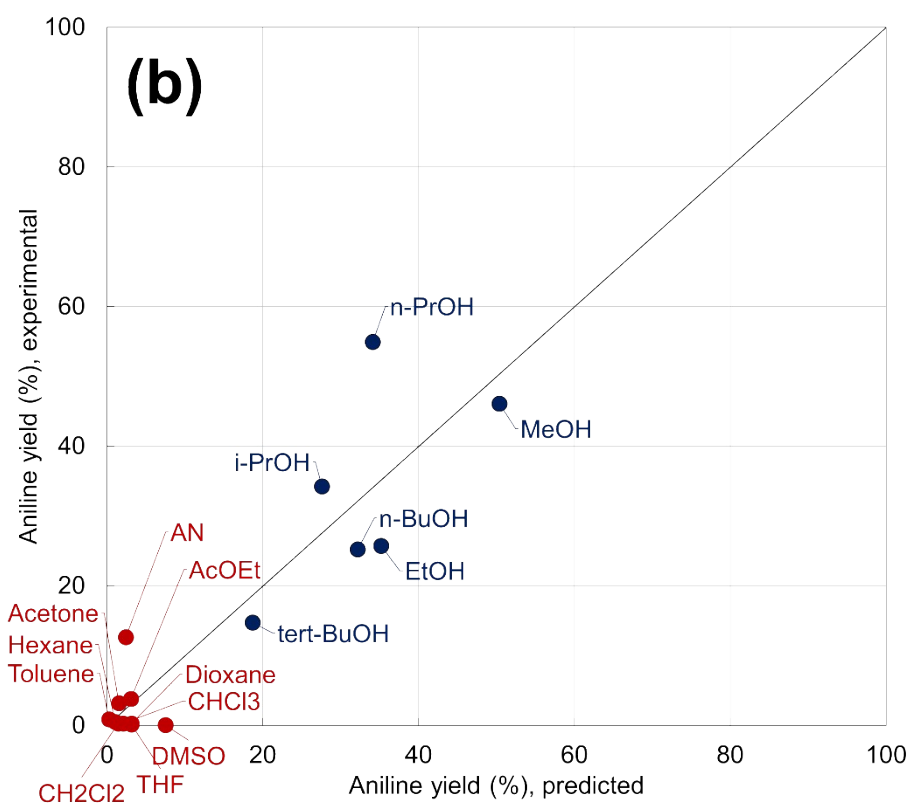

**Fig. S5.** Multiple regression analysis of (a) **NBCONV** and (b) **ANYIEL** on Catalán model. Blue: protic solvents/alcohols, red: aprotic solvents

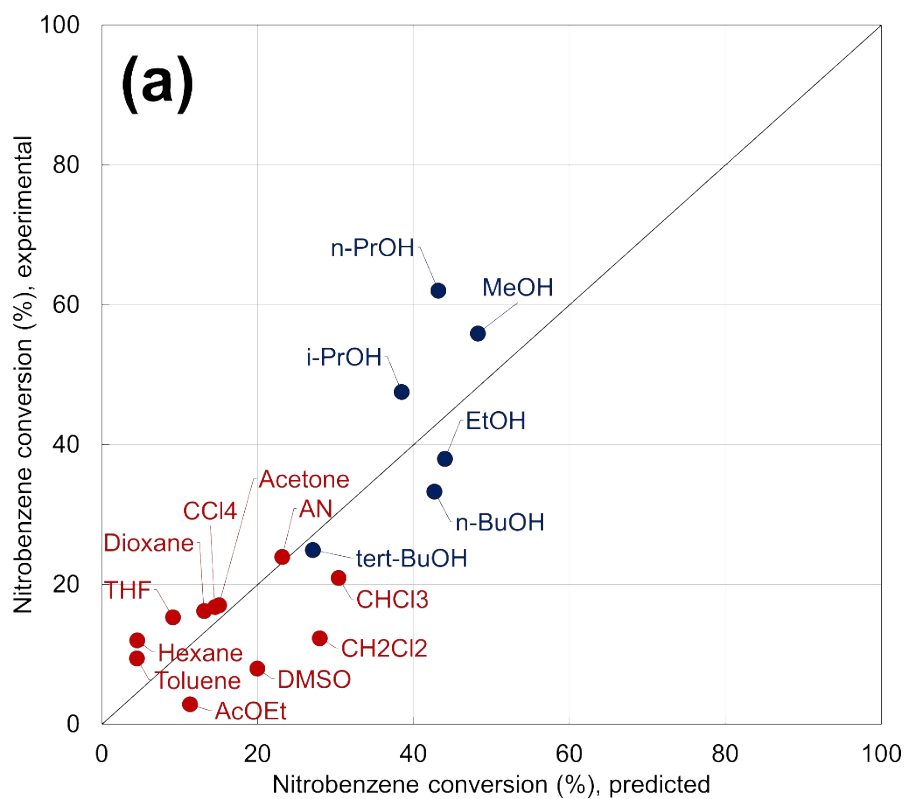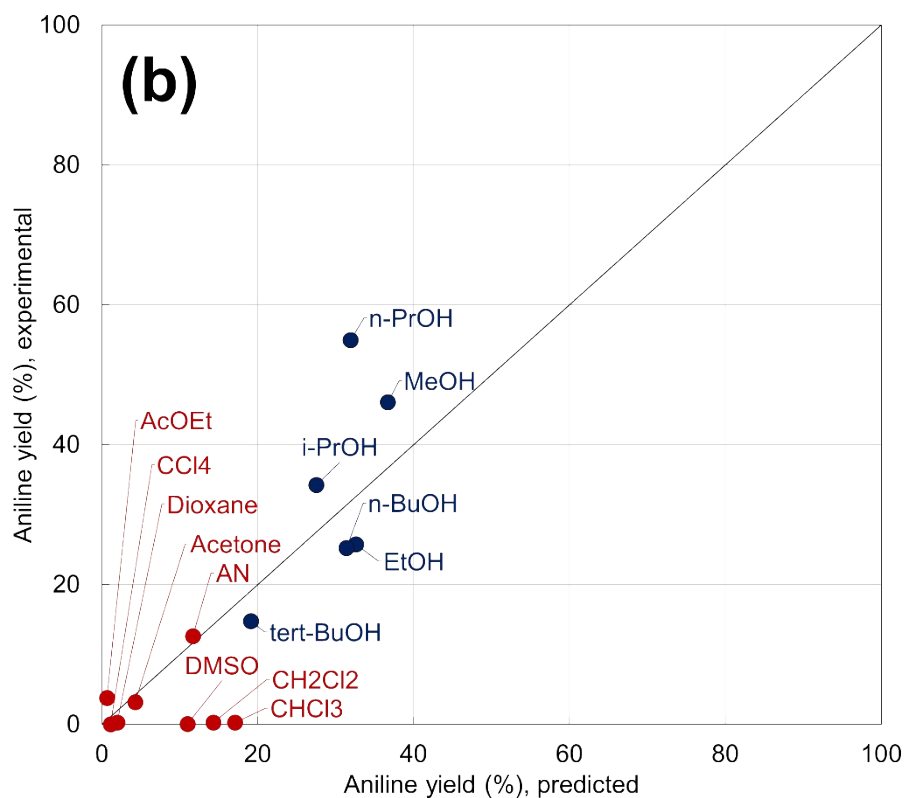

**Fig. S6.** Multiple regression analysis of (a) **NBCONV** and (b) **ANYIEL** on Gutmann model. Blue: protic solvents/alcohols, red: aprotic solvents

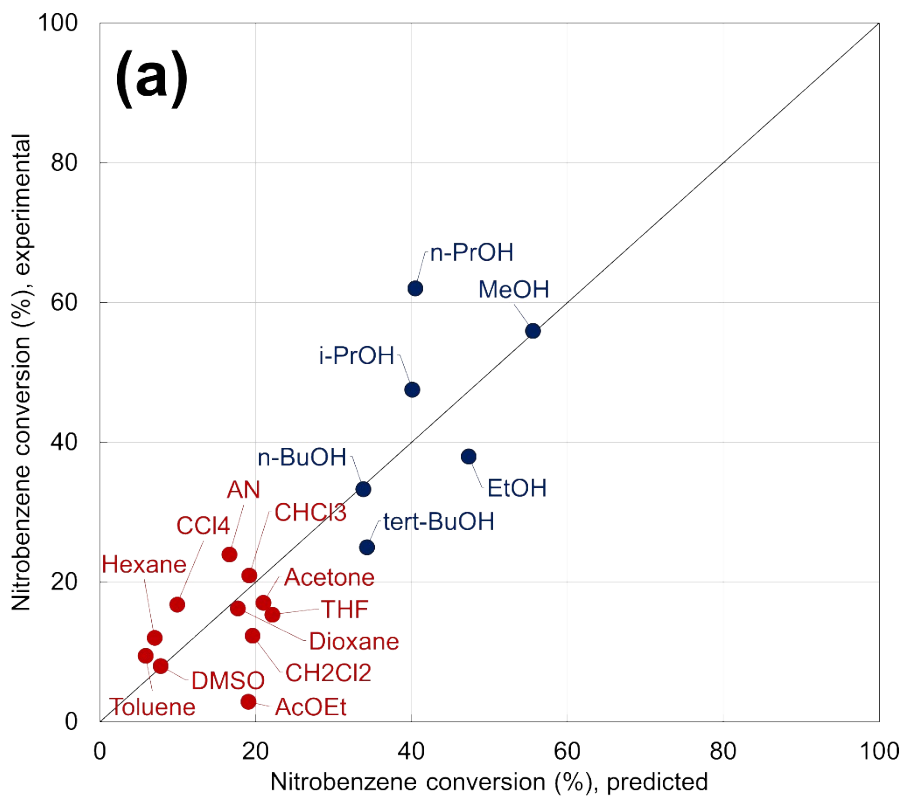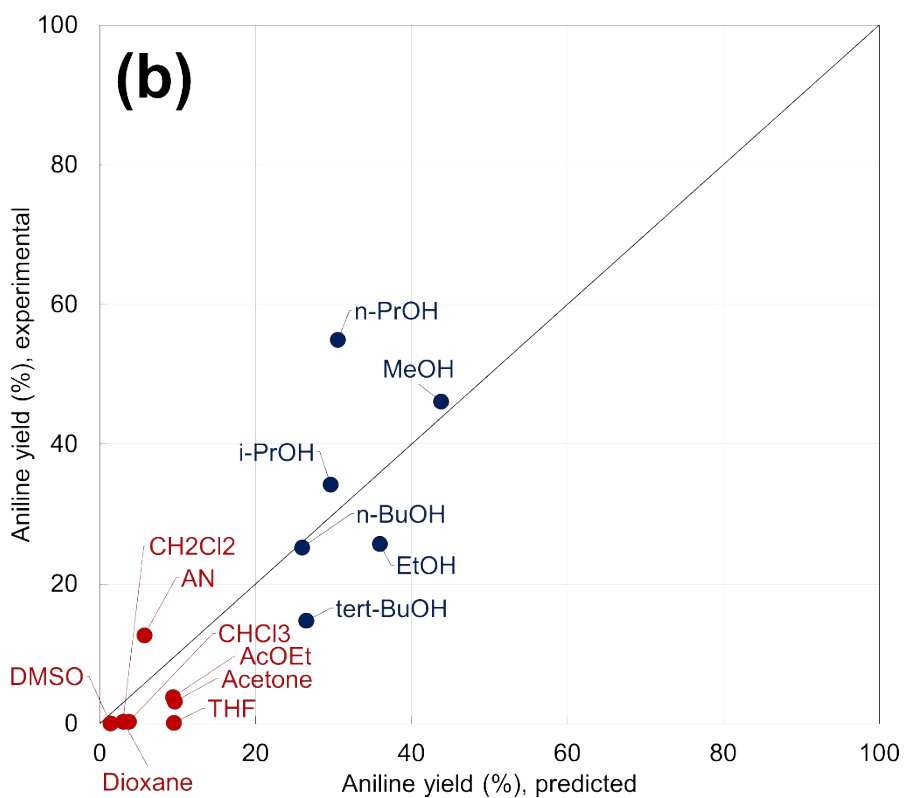

**Fig. S7.** Multiple regression analysis of (a) **NBCONV** and (b) **ANYIEL** on Hansen model. Blue: protic solvents/alcohols, red: aprotic solvents

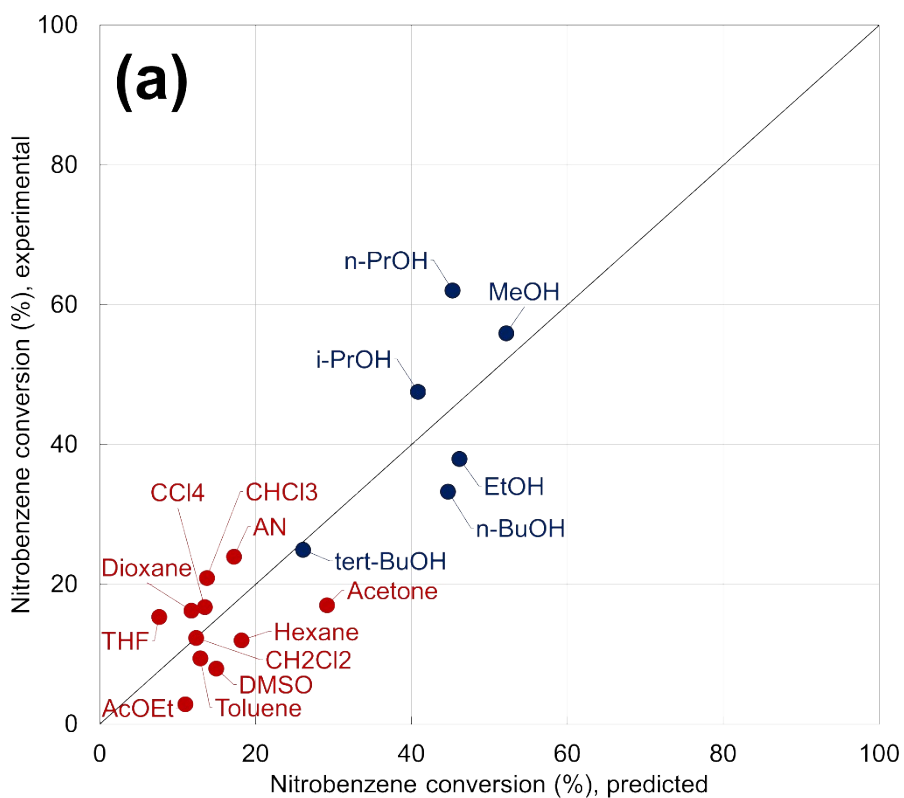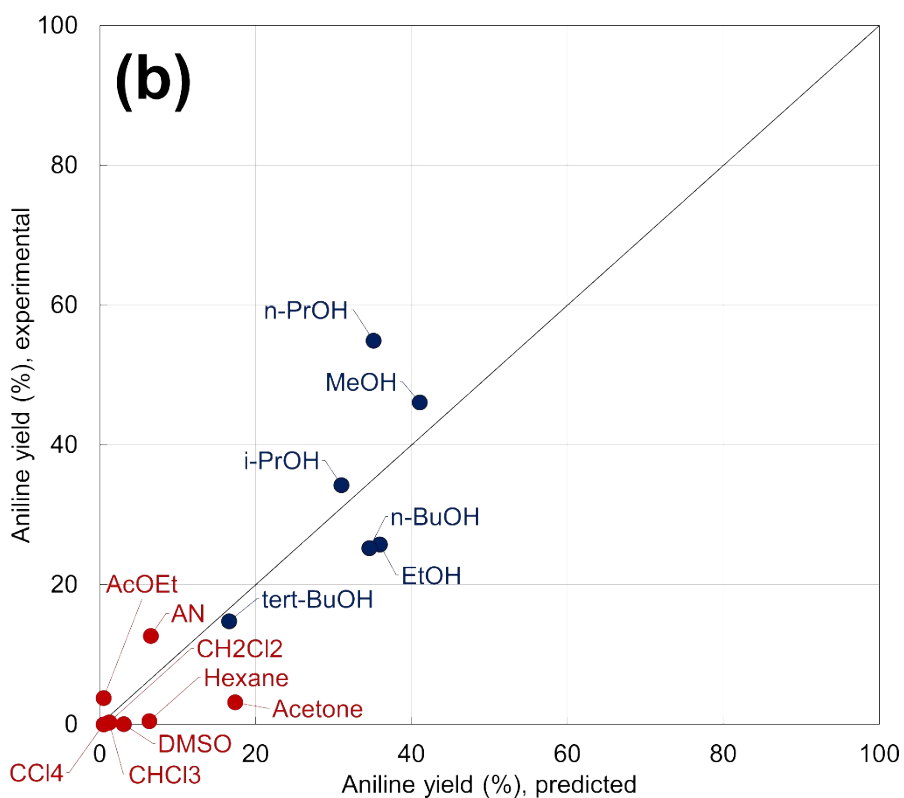

**Fig. S8.** Multiple regression analysis of (a) **NBCONV** and (b) **ANYIEL** on KP model. Blue: protic solvents/alcohols, red: aprotic solvents

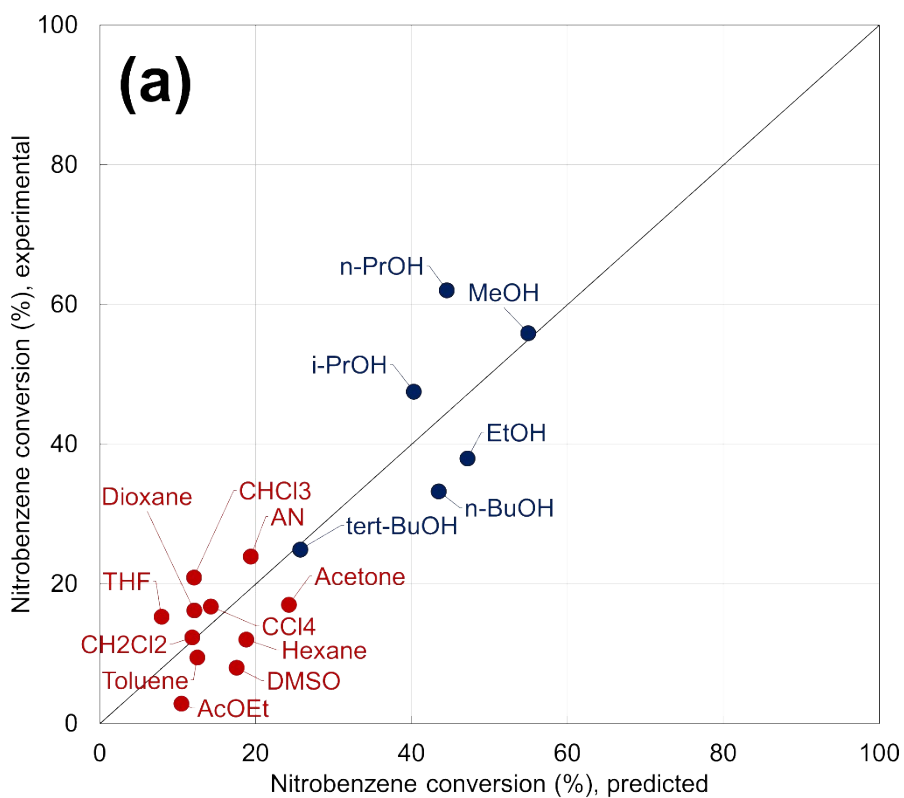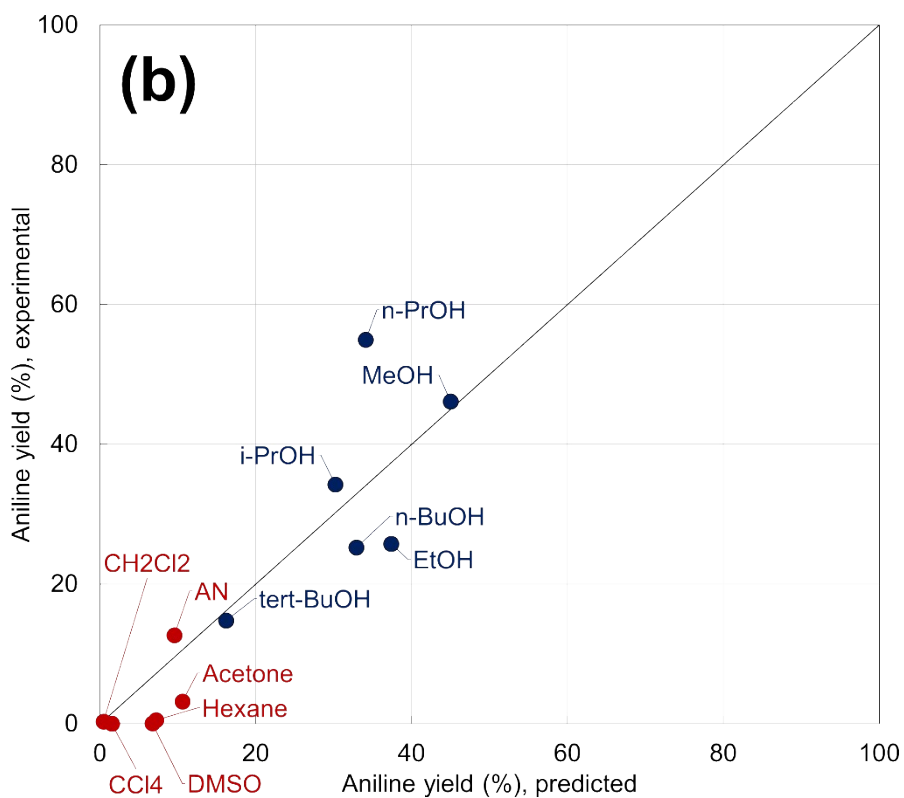

**Fig. S9.** Multiple regression analysis of (a) **NBCONV** and (b) **ANYIEL** on KP model with correction on Hildebrand's cohesion energy density. Blue: protic solvents/alcohols, red: aprotic solvents

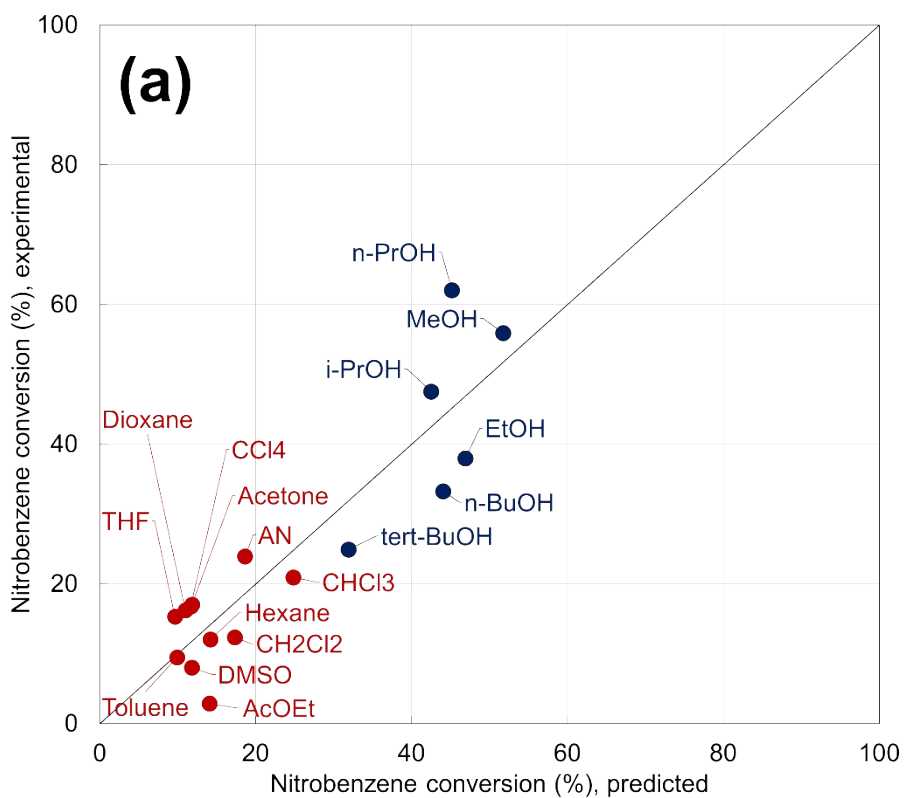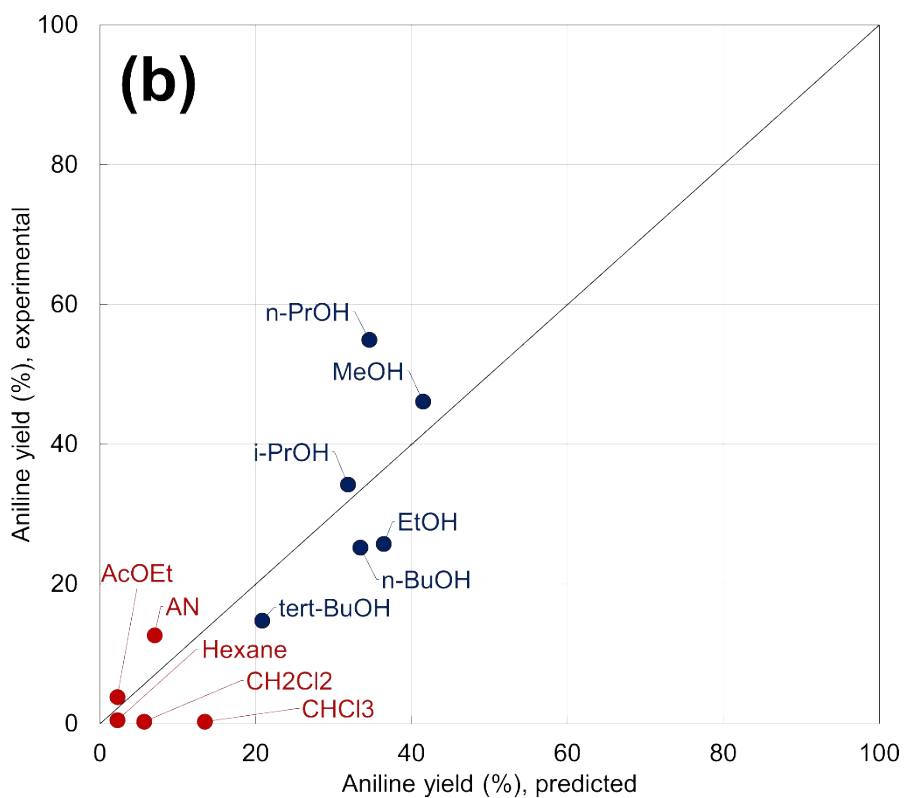

**Fig. S10.** Multiple regression analysis of (a) **NBCONV** and (b) **ANYIEL** on Swain model. Blue: protic solvents/alcohols, red: aprotic solvents

## References

- [1] Aqueous Solubility (Log Sw), <https://www.stenutz.eu/chem/solv33.php>
- [2] Common Solvents Used in Organic Chemistry: Table of Properties, <https://organicchemistrydata.org/solvents/>
- [3] A5: Dipole Moments, [https://chem.libretexts.org/Ancillary\\_Materials/Reference/Reference\\_Tables/Atomic\\_and\\_Molecular\\_Properties/A5%3A\\_Dipole\\_Moments](https://chem.libretexts.org/Ancillary_Materials/Reference/Reference_Tables/Atomic_and_Molecular_Properties/A5%3A_Dipole_Moments)
- [4] Anonymous, <https://people.chem.umass.edu/xray/solvent.html>
- [5] V. Fajt, L. Kurc, and L. Červený, *Int. J. Chem. Kinet.*, 2008, **40**, 240–252.
- [6] Q. Liu, F. Takemura, and A. Yabe, *J. Chem. Eng. Data*, 1996, **41**, 1141-1143.
- [7] J. Pardo, M.C. López, J. Santafé, F.M. Royo, and J.S. Urieta, *Fluid Phase Equilib.*, 1995, **109**, 29-37.
- [8] K. Shirono, T. Morimatsu, and F. Takemura, *J. Chem. Eng. Data*, 2008, **53**, 1867-1871.
- [9] E. Brunner, *J. Chem. Eng. Data*, 1985, **30**, 3, 269-273.
- [10] Dielectric constants and refractive index, [https://www.stenutz.eu/chem/dielectric\\_ri.php](https://www.stenutz.eu/chem/dielectric_ri.php)
- [11] Log P, partition between octanol and water, <https://www.stenutz.eu/chem/logP.php>
- [12] Solvent Miscibility, <https://www.precisionlabware.com/content/18-solvent-miscibility>
- [13] Physical properties of alcohols, <https://www.britannica.com/science/alcohol/Physical-properties-of-alcohols>
- [14] Surface Tension, [https://www.engineeringtoolbox.com/surface-tension-d\\_962.html](https://www.engineeringtoolbox.com/surface-tension-d_962.html)
- [15] Viscosity, <https://www.stenutz.eu/chem/solv30.php>
- [16] J. S. Chickos, and W. E. Acree, Jr., 2003, *J. Phys. Chem. Ref. Data*, 2003, **32** (2), 519–878.
- [17] C. M. Hansen, *Hansen Solubility Parameters A User's Handbook*, CRC Press Taylor & Francis Group, 2007.
- [18] Kamlet-Taft solvent parameters, <https://www.stenutz.eu/chem/kamlettaft.php>
- [19] S. Henkel, M. C. Misuraca, P. Troselj, J. Davidson, and C. A. Hunter, *Chem. Sci.*, 2018, **9**, 88–99.
- [20] W. E. Waghorne, 2020, *J. Solution Chem.*, **49**, 466–485.
- [21] SPP solubility parameters, <https://www.stenutz.eu/chem/solv25.php?sort=4>
- [22] Gutmann acceptor and donor numbers, <https://www.stenutz.eu/chem/gutmann.php>
- [23] Swain Acidity and Basicity, <https://www.stenutz.eu/chem/swain.php>
- [24] Dimroth and Reichardt ET, <https://www.stenutz.eu/chem/dimroth.php>
